1 **Title:**

2 Focusing on human haplotype diversity in numerous individual genomes demonstrates an  
3 evolutionary feature of each locus

4

5 **Authors and affiliations:**

6 Makoto K. Shimada<sup>1\*</sup>, Tsunetoshi Nishida<sup>1,2</sup>

7 1. Institute for Comprehensive Medical Science, Fujita Health University

8 2. [Present Affiliation] Nishida Computing Service

9

10 \*Author for Correspondence: Makoto K. Shimada, Department of Gene Expression Mechanism,  
11 Institute for Comprehensive Medical Science, Fujita Health University, Aichi 470-1192, Japan

12 Phone: +81-562-93-9380

13 FAX: +81-562-93-8834

14 Email: [mshimada@fujita-hu.ac.jp](mailto:mshimada@fujita-hu.ac.jp)

15

16

17 **Abstract**

18 The application of current genome-wide sequencing techniques on human populations helps  
19 elucidate the considerable gene flow among genus *Homo*, which includes modern and archaic  
20 humans. Gene flow among current human populations has been studied using frequencies of single  
21 nucleotide polymorphisms. Unlike single nucleotide polymorphism frequency data, haplotype data  
22 are suitable for identifying and tracing rare evolutionary events. Haplotype data can also  
23 conveniently detect genomic location and estimate molecular function that may be a target of  
24 selection. We analyzed eight loci of the human genome using the same procedure for each locus to  
25 infer human haplotype diversity and reevaluate past explanations of the evolutionary mechanisms  
26 that affected these loci. These loci have been recognized by separate studies because of their unusual  
27 gene genealogy and geographic distributions that are inconsistent with the recent out-of-Africa  
28 model. For each locus, we constructed genealogies for haplotypes using sequence data of the 1000  
29 Genomes Project. Then, we performed S\* analysis to estimate distinct gene flow events other than  
30 out-of-Africa events. Furthermore, we also estimated unevenness of selective pressure between  
31 haplotypes by Extended Haplotype Homozygosity analysis. Based on the patterns of results obtained  
32 by this combination of analyses, we classified the examined loci without using a specific population  
33 model. This simple method helped clarify evolutionary events for each locus, including rare  
34 evolutionary events such as introgression, incomplete lineage sorting, selection, and haplotype  
35 recombination that may be hard to discriminate from each other.

36

- 1 Key words:
- 2 extended haplotype homozygosity (EHH)
- 3 S\*analysis
- 4 gene flow
- 5 introgression
- 6 incomplete lineage sorting
- 7 ancient polymorphism
- 8

## 1 Introduction

2 Recent advancements in ancient genomics have provided unprecedented insights into ancient  
3 population dynamics, which include migration and bi-directional gene flow of archaic human groups,  
4 such as Neandertals and Asian *Homo erectus* (Green et al. 2010; Reich et al. 2011; Meyer et al.  
5 2012; Fu et al. 2014; Prufer et al. 2014; Kuhlwilm et al. 2016). This information revealed that  
6 genomes of modern human populations contained various genomic fragments that originated from  
7 archaic humans, and some studies suggested that introgressed genomic fragments are adaptive in  
8 certain environments (Sankararaman et al. 2014; Racimo et al. 2016; Sankararaman et al. 2016;  
9 Simonti et al. 2016; Dannemann and Kelso 2017; Enard and Petrov 2018)(rev., Dannemann and  
10 Racimo 2018).

11 Furthermore, recently developed sequencing technology has changed data in format and quantity,  
12 which has prompted innovation of data analysis. Data used in human genome evolution can be  
13 classified into two types: frequency and sequence data.

14 Single nucleotide polymorphism (SNP) frequency in current populations has been mainly processed  
15 to analyze genomic relationships among human populations in most human genomics studies (Harris  
16 and Michael 2017). Research using SNP frequency data can address genetic similarities among  
17 populations, population structure, effective population sizes, gene flow, and selection; additionally,  
18 disease-causing variants have been suggested by genome-wide association studies. Because  
19 frequency data are advantageous in quantitative analyses, they have also been applied to estimate the  
20 extent of gene flow among populations (e.g., Mallick et al. 2016; Mondal et al. 2016; Jinam et al.  
21 2017; Lipson and Reich 2017).

22 Although SNP data were treated as independent from each other, haplotype sequence data are a  
23 collective body of neighboring SNPs that share common evolutionary history and molecular function.  
24 Accordingly, haplotype data comparatively easily connect to information about sequence motifs and  
25 genomic position. If simple, established methods that use haplotype data are available in population  
26 genomics, researchers can estimate molecular function of genomic regions that were suggested to be  
27 introgressed from other populations and selected for in the introgressed population.

28 Sequencing technology advancements have also facilitated genome-wide studies that effectively  
29 reveal past demographic process without bias in choosing target locus. Differing from demographic  
30 events, however, introgression events leave a signal, and fragmented sequences can be detected in  
31 the form of a patchwork or mosaic through recombination and drift at each locus. Consequently, the  
32 accumulated locus-oriented studies are indispensable for characterizing and comprehending gene  
33 flow and allele maintenance mechanisms (Mendez et al. 2012a). Additionally, even before the first  
34 genome-wide sequencing of archaic humans by Green et al. (2010), some studies on modern humans  
35 claimed that unusual haplotypes were inconsistent with the recent out-of-Africa (OOA) model based  
36 on their gene genealogy and geographic distribution pattern (Zietkiewicz et al. 2003; Garrigan et al.

1 2005a; Garrigan et al. 2005b; Hardy et al. 2005; Stefansson et al. 2005; Shimada et al. 2007). Such  
2 diversified haplotypes within modern human population genomes have been studied separately  
3 (Evans et al. 2006; Shimada et al. 2007; Cox et al. 2008; Donnelly et al. 2010; Yotova et al. 2011;  
4 Mendez et al. 2012b; Ding et al. 2013; Mendez et al. 2013). Recently, a lot of individual human  
5 genomes have been sequenced, including those of archaic humans, which has allowed researchers to  
6 evaluate the origin of genome-scale variation using a unified method. However, the following  
7 problems hamper the use of haplotype data from a large number of individual genomes. First, there  
8 is no practical definition of a genomic region of interest (locus) from the massive amount of  
9 genome-wide data. A sequence-based analysis, such as gene genealogy, uses the locus as a  
10 specifically defined unit of sequence alignment. To ensure accuracy, a longer genomic region with a  
11 larger data set that shares common evolutionary history should be selected as a locus to be analyzed.  
12 Long sequences without recombination hotspots were preferred in previous studies to obtain a better  
13 estimate of TMRCA in population genetic analysis (Cox et al. 2008). The available genome-wide  
14 data sets of individuals from multiple populations contain recombined haplotypes that have  
15 independently recombined in various genomic positions. Furthermore, a large amount of longer  
16 sequence data sets may be more frequently influenced by factors such as inversion, gene duplication,  
17 copy number variation, and selection. Accordingly, there should be focus on developing a definition  
18 of a locus. Second, there is no method to distinguish between introgression and incomplete lineage  
19 sorting (ILS) of ancestral polymorphisms. Genomes are thought to contain both genomic fragments  
20 that were derived from introgression and retained via ILS (Wang et al. 2018). Furthermore, different  
21 gene genealogical patterns are expected depending on order of coalescence and population division  
22 (Joly et al. 2009). Accordingly, discrimination between them is impossible by gene genealogy alone.  
23 As larger data sets are used, such difficulties are expected to be encountered with a higher frequency.  
24 Previous studies have suggested that a simple dichotomic framework is not sufficient to judge ILS or  
25 introgression in Eurasia after OOA (e.g., Shimada et al. 2007; Campbell and Tishkoff 2010; Lipson  
26 and Reich 2017; Povysil and Hochreiter 2017). A specific model-based verification method cannot  
27 always be applied for all evolutionary events that have been experienced in human populations.  
28 Consequently, a simple, model-free method with fewer assumptions is needed to focus on questions  
29 regarding the development of population genomics with a large amount of individual genome-wide  
30 data.

31 The purpose of this study was to provide various examples of human genome diversity using a single  
32 combination of haplotype-based methods. This will help: 1) define a locus in genome-wide sequence  
33 data from a massive amount of individuals, and 2) compare and reevaluate differences in haplotype  
34 variation among genomic segments that reflect evolutionary history. Therefore, we focused on eight  
35 loci that have been noted to have unusual gene genealogy and/or geographic distributions  
36 inconsistent with the OOA model (Table 1). Using a public catalog of human variation, the 1000

1 Genomes Project, as a common data set for these eight loci, we demonstrated haplotype genealogy  
2 with estimation of haplotype-specific selection and introgression from known and unknown archaic  
3 humans. Using  $S^*$  analysis, we estimated introgression from archaic hominins found in the 1000  
4 Genome Project samples for these eight loci. We also evaluated unevenness of selective pressure  
5 between the most diverged haplotypes and other haplotypes across the examined loci using Extended  
6 Haplotype Homozygosity (EHH) analysis. These strategies demonstrated that genomes of human  
7 populations contain various backgrounds, and this approach represents a possible method to  
8 distinguish introgression from ILS.

## 10 Results

### 11 Gene Genealogies

12 We constructed a distance-method based phylogenetic tree (i.e., neighbor-joining, NJ) and  
13 phylogenetic network for eight loci, and encountered inconsistency in obtained topology between the  
14 two methods for four loci: Xp11hs, dys44, MCPH1, and HYAL (Table s1, Fig. 1, Fig. s1, Fig. 2). For  
15 example, the allelic genealogy of MCPH1 showed a separated distribution of the haplotypes bearing  
16 a derived allele “C” at the focal SNP and specifically discriminated the focal haplotypes, such as  
17 haplotype *R* in the network (Fig. 2) despite the clumped distribution in the NJ tree (Fig. 1, see  
18 Discussion).

19 The phylogenetic networks showed a substantial number of parallelograms in some loci that are  
20 characterized by small-sized edges, such as dys44 and HYAL. However, parallelograms with large  
21 edges were found in other loci, such as Xp11hs, STAT2, and OAS; this indicates recombination  
22 events within a locus (see Discussion).

23 We classified the haplotype genealogy results into six groups according to tree topological  
24 relationships among haplotypes from African, Eurasian, and archaic hominins considering time,  
25 place, and direction of gene flow (Fig. 3).

26 For introgression from known archaic hominins (i.e., Altai Neanderthal and Denisovan in this study)  
27 to modern humans, we considered the possibilities of post-OOA in Eurasia [type FE] and  
28 pre/post-OOA in Africa [type FA]. We did not distinguish pre- and post-OOA introgressions that  
29 have remained within Africa, because they were expected to be indistinguishable in haplotype  
30 genealogy. Alternatively, introgression from ancestors of modern Eurasians to archaic humans was  
31 expected to have occurred after OOA in Eurasia [type Af]. We also considered the possibility of  
32 introgression from unknown archaic hominins to modern humans, which occurred both post-OOA in  
33 Eurasia [type Ea] and pre-OOA in Africa [type Co].

34 We could not rule out the possibility of ILS of ancestral polymorphisms by haplotype tree topology  
35 for three types [types FE, FA, and Co] within these classifications.

36

1 **S\***  
2 S\* is a method that enables estimation of the presence and amount of gene flow between  
3 sub-populations by detecting combinations of rare alleles (Plagnol and Wall 2006; Vernot et al.  
4 2016). We performed S\* analysis to estimate distinct gene flow events from archaic hominins after  
5 OOA using Africans as a reference population and detect novel SNP allele combinations in modern  
6 humans that only exist in Eurasia. We modified S\* analysis to apply phased massive genome  
7 sequence data and highlight haplotypes with high S\* scores. Then, we classified obtained S\* into  
8 three classes (i.e., high, medium, and low introgression grades; see ‘S\* analysis’; ‘Algorithm’ in  
9 Materials and Methods). The S\* score showed signs of gene flow after OOA in all eight examined  
10 loci to a greater or lesser degree (Table 3, Fig. s2). We observed clusters that included haplotypes  
11 with high S\* scores and haplotypes of known archaic hominins in clusters *A* and *B* at *dys44*, clusters  
12 *A* and *B* at *RRM2P4*, cluster *O* at *MCPH1*, clusters *A* to *F* at *OAS*, and clusters *C* and *O* at *HYAL*  
13 (Table 3, Fig. 1). These findings indicate the possibility of gene flow between the archaic hominins  
14 and Eurasians after OOA. Three of the loci (*dys44*, *RRM2P4*, and *OAS*) showed type FE topology,  
15 which supports introgression in Eurasia after OOA (Fig. 1, Table 2).  
16 Clusters composed of archaic hominins and Eurasians also had high S\* scores in cluster *O* in  
17 *MCPH1* and cluster *C* in *HYAL* loci, but these topologies were not type FE but type Af (Table 2,  
18 Table 3). The S\* scores in these clusters suggested one of the two Af scenarios: ancient subdivision  
19 within Africa before the leaving of Neanderthals from Africa (Fig. 3, right of Af, See Discussion). In  
20 the *HYAL* locus, cluster *O* showed a medium S\* score in a small number of haplotypes. Moreover,  
21 the position of cluster *O* in the network suggested recombination between *N* and *T*, which may  
22 produce SNP combinations not found in the reference population (Africans).  
23 We also observed S\* haplotypes in the outermost cluster that were located close to but separate from  
24 the haplotypes of known archaic hominins in the gene genealogies of *Xp11hs* and *STAT2* (Table 3).  
25 These diverged clusters of *Xp11hs* and *STAT2* contained high S\* haplotypes composed of various  
26 populations (cosmopolitan clusters) without geographically aggregated sub-clusters. Generally, a  
27 random geographic distribution is considered ILS (Zhou et al. 2017), and these diverged clusters in  
28 these two loci can be attributed to events that produce polymorphisms that existed before or during  
29 OOA, rather than introgression from archaic humans after OOA. Although a similar pattern was also  
30 shown in the *17q21inv* locus, introgression was not necessarily needed to explain this pattern  
31 because of limited recombination between chromosomes, with different orientations caused by  
32 inversions (see Discussion).  
33 Some of these phylogenetic trees and networks showed the effect of recent admixture in Americans,  
34 because American samples used in the 1000 Genomes Project are “admixture individuals” from  
35 various North Americans, not native American individuals, which is documented as “Ad Mixed  
36 American” in The International Genome Sample Resource

1 (<http://www.internationalgenome.org/faq/which-populations-are-part-your-study>) (Table s2). Two  
2 American haplotypes with high  $S^*$  scores were observed in African clusters (cluster *A* at HYAL and  
3 cluster *N* at OAS). Both of these African clusters were small and separated from other African  
4 clusters in the tree. These findings indicate that Americans inherited these haplotypes from Africans,  
5 and these haplotypes are even rare in Africans, which resulted in high and medium  $S^*$  scores on  
6 these haplotypes; therefore, these  $S^*$  scores may not necessarily be caused by introgression.

## 8 Extended Haplotype Homozygosity

9 Extended Haplotype Homozygosity (EHH) is a measurement that indicates the probability of the  
10 presence of a continuous linkage disequilibrium (LD) block and is defined as the probability that two  
11 randomly chosen chromosomes bearing the same allele of a given focal SNP site are identical  
12 haplotypes within a genomic region that is  $x$  distance from the focal SNP site (Sabeti, PC et al. 2002).  
13 EHH was developed to detect positively selected alleles through comparison of LD block presence  
14 probability of focal SNP alleles. We used EHH to evaluate our locus-defining method that was  
15 determined by LD  $r^2$  measure.

16 Comparison of genomic region length ratio of EHH to LD (*R.length*) indicated that EHH regions  
17 were shorter than LD regions in all examined loci (Fig. 4a, Table s3). Although the *R.length* ranged  
18 two orders of magnitude (0.005–0.462), the SNP density ratio of EHH to LD regions showed a  
19 1.57-fold difference (0.856–1.345; Fig. 4b, Table s3); this indicated that a smaller EHH than LD is  
20 not caused by the poor availability of SNP data. We suggest that the *R.length* difference resulted  
21 from differences in the extent of recombination (Table s3).

22 The bifurcation graphs of EHH analysis showed bifurcations of multiple lineages at a single SNP  
23 position, which suggests exchange of SNP alleles between haplotypes via recombination (Fig. 5).

24 Our EHH analysis indicated selection on only a specific allele in the MCPH1 locus among the eight  
25 examined loci (Table 2 EHH column, Table s3). The EHH range of derived allele “C” from rs930557  
26 was longer than that of ancestral one “G,” which is explained by selective sweep in the MCPH1  
27 locus (Fig. 5a). The MCPH1 bifurcation graph for ancestral allele “G” showed succession of  
28 bifurcations in multiple branches at common genomic positions, such as 6301472, 6301546,  
29 6302671, 6302962, and 6302971, which indicates the existence of SNP sites that share alleles with  
30 other haplotypes (Fig. 5b & 5c, Fig. s3). This indicates the existence of recombination among  
31 haplotypes bearing the ancestral allele “G” at rs930557 (Fig. 5c). Meanwhile, however, almost all  
32 bifurcations were observed in a single lineage of haplotypes with the derived allele “C” at rs930557,  
33 which suggests that a novel mutation generated a novel bifurcation (Fig. 5b). This is explained by  
34 selective sweep of haplotypes bearing the derived allele “C”.

35 Although Stefansson (2005) suggested positive selection of the H2 lineage in the 17q21inv locus,  
36 this was not confirmed by our EHH (Table 1).

1 We also noted that the bifurcation graphs depicted a skewed distribution of branching points of  
2 haplotypes in OAS, HYAL, and Xp11hs (Fig. s4). Consequently, the numbers of haplotypes did not  
3 increase in proportion to the distance from the focal SNP position in these regions. This is due to  
4 SNP density change, which represents the existence of differences in evolutionary constraints within  
5 the EHH region; the region with fewer SNP sites was confirmed to overlap with the promoter region  
6 of the SHROOM4 gene in Xp11hs, transcribed region of the OAS1 gene, and the transcribed region  
7 of the HYAL3 gene (Table 2, column “CR,” Table s3). Thus, EHH analysis indicated the existence  
8 and extent of selective pressure on haplotypes.

9

## 10 Discussion

### 11 Significance of This Study

12 This study demonstrated that each locus has their own evolutionary history, which was previously  
13 missed by allele frequency-based analyses. Using massive individual genome data, our  
14 combinatorial analysis that consisted of tree topology classification,  $S^*$ , and EHH analyses can  
15 clarify how selection pressure varies by haplotype. We demonstrated the effectiveness, utility, and  
16 reliability of each analysis. First, in haplotype genealogy, clustering of archaic hominins with  
17 multiple modern humans with high  $S^*$  scores likely represents introgression. Second, EHH analysis  
18 is useful for detecting regions that are under functional constraint and selective sweep. The length  
19 ratio between LD and EHH regions is useful for clarifying the amount of recombination. We also  
20 identified concepts that should be discussed further, such as comprehensiveness of African samples  
21 and definition of loci in genome-wide individual genome sequence data that may contain various  
22 recombinations in different genomic locations depending on haplotypes.

23

### 24 Signs of Introgression from Archaic *Homo* and Diversity in *H. sapiens*

25 This study confirmed multiple hybridization events caused by divergence followed by subsequent  
26 contact after isolation. Introgression from archaic hominins is highly likely when a haplotype of  
27 archaic hominins is clustered with multiple modern haplotypes with high  $S^*$  scores. However, high  
28  $S^*$  scoring modern haplotypes without clustering with archaic hominins may have been caused by  
29 insufficient samples sizes of the reference population, novel combinations of rare alleles by recent  
30 recombination, and gene flow with unknown archaic hominins.

31 An earlier study showed several gene flow events among archaic human groups, which included  
32 unknown archaic groups (i.e., not Neanderthals and Denisovans) (Prufer et al. 2014). This study  
33 demonstrated that *H. sapiens* experienced more population subdivision and hybridization events than  
34 expected based on known introgression from Neanderthals and Denisovans. ILS of ancestral  
35 polymorphisms alone cannot explain the complexity that we showed. Our findings indicate the



1 presence of highly structured populations within Africa, which includes ILS during population  
2 subdivision and several introgression events with unknown populations of genus *Homo*.

3 The Neanderthal and Denisovan haplotypes had different locations in the tree topology of three loci  
4 (dys44, RRM2P4, OAS), and the Neanderthal haplotypes showed the possibility of introgression  
5 (type FE), but those of Denisovans did not show a clear trend (Table 2). This difference between  
6 Neanderthal and Denisovan haplotypes resulted from a history of migration and hybridization with  
7 modern humans. It is noteworthy that Denisovan genomes contained components that were  
8 introgressed from other archaic populations, which were deeply diverged from a common ancestor  
9 of Neanderthal, Denisovan, and modern humans (Prufer et al. 2014).

10

### 11 Effects of Selection

12 As the 1000 Genomes Consortium observed, rare variants generally originate by recent mutation,  
13 which causes a negative correlation between variant frequency and haplotype length (The 1000  
14 Genomes Project Consortium 2012). As expected from this relationship, comparatively longer EHH  
15 were observed in rare alleles with minor allele frequency (MAF)  $< 0.1$  in bifurcation graphs of our  
16 EHH analyses (Table s3), we did not further analyze these rare alleles. Without considering this  
17 relationship, an apparent longer EHH of a rare allele compared with that of a major allele may  
18 produce a misleading inference about the selection of haplotypes with rare alleles. The  
19 phylogeographic network of the HYAL locus indicates that the most diverged haplotype A  
20 accumulated a lot of singleton SNP variants, although only small parts of SNP sites were shared with  
21 haplotypes B and S, which indicates limited recombination among them (Fig. 2). The EHH analysis  
22 did not provide enough evidence for selection for the haplotype A because of a low frequency of the  
23 minor allele carried by haplotype A (Table s3, Fig. s4). Considering branch lengths and phylogenetic  
24 relationships including ancient genomes of other hominins, haplotype A of the HYAL locus may be a  
25 rare neutral variant that existed in modern humans in Africa before the divergence of the modern  
26 human lineage from archaic human groups such as Neanderthals and Denisovans.

27

### 28 Effects of Recombination

29 Some of the median networks in this study formed complex aggregation of parallelograms (Table s1,  
30 column 'Size and frequency of reticulation in phylogenetic network'). We manually omitted a  
31 considerable amount of parallelograms (see Materials and Methods) because of the large sample size  
32 and long locus regions. Because we constructed median networks that were categorized as split  
33 networks, consecutive SNPs in genome position observed on parallel edges implicitly represent  
34 evolutionary events that occurred on a genomic fragment, such as recombination, horizontal gene  
35 transfer, or gene duplication (systematic error) (Huson and Bryant 2006); this is more likely for large  
36 parallelograms that have long edges with numerous consecutive SNPs. Alternatively, short edges

1 with a small number of SNPs separated from each other can be formed by parallel and convergent  
2 substitution. Huson and Bryant (2006) distinguished the systematic error from the sampling error,  
3 which is random error that results from a small sample size (number of SNP sites). Then, they  
4 highlighted that the rapid growth in availability of large genomic sequences increased the  
5 importance of systematic errors but diminished the impact of sampling error on phylogenetic  
6 inference. Accordingly, we actually found that recombination resulted in systematic errors such as  
7 large parallelograms in our phylogenetic networks, especially because we defined a locus being as  
8 long as possible by LD in this study. However, owing to our definition of a locus, we observed  
9 recombination between the two short loci used in separate two studies that determined haplotypes of  
10 the OAS gene region (Mendez *et al.* 2012a; 2013). Mendez *et al.* (2012a) determined haplotypes  
11 based on the 5' end region, which included exons 1–3, whereas Mendez *et al.* (2013) started typing  
12 based on 15 SNPs that spanned about 760 bp at the 3' end, which included exons 4–6 of the OAS1  
13 gene. The recombination between the two short loci may cause confusion about relationships among  
14 the haplotypes determined by the two studies, because genealogical relationships among haplotypes  
15 are recognized by landmark haplotypes, such as haplotypes of the human reference genome, the two  
16 archaic humans, and introgression candidates. Our locus (30.9 kb) determined by LD block  
17 overlapped with the 3' end; this included exons 4–6 of the OAS1 gene, which were the focus of the  
18 study conducted by Mendez *et al.* (2013). Consequently, our results were consistent with those of  
19 Mendez *et al.* (2013) and showed that Eurasian haplotypes had a close relationship with  
20 Neanderthals (topology type FE), although Mendez *et al.* (2013) used Neanderthals from Vindija  
21 Cave, Croatia, whereas we used a Neanderthal from the Altai Mountains, Russia. Even though  
22 Mendez *et al.* (2013) did not explicitly discuss the relationship with Denisovan haplotypes, our  
23 results based on the overlapping genomic region with Mendez *et al.* (2013) represent a distant  
24 relationship between Denisovans and Neanderthals (Fig. 1, Fig. 2). Our study did not provide  
25 evidence of post-OOA introgression from Denisovans (topology type FA, Table 2), although our loci  
26 are included in their “Denisova Introgressive Block (~90 kb)” that was introgressed from  
27 Denisovans to Melanesians, which was detected using the HGDP panel mentioned in the Mendez *et al.*  
28 *al.* (2012a) and depicted in Figure 1 of Mendez *et al.* (2013). This difference in results is probably  
29 because Melanesians were not included in our samples. Further investigation of recombination  
30 between the two loci that includes Melanesian samples is needed.

31 Recombination also potentially affects S\* analysis. Because S\* score indicates the possibility of  
32 introgression based on two rare alleles that are colocalized within a haplotype that are absent from  
33 the reference population (Africans in this case), recombination may generate novel combinations of  
34 two rare alleles in a recombinant haplotype that yields a high S\* score. In this study, we found one  
35 candidate of this example in haplotype O of the HYAL locus (Fig. 1).

36

## 1 Inconsistency between Phylogenetic Inferences by Network and Distance 2 Methods

3 Our close examination provides a rationale for the differences in inferences of phylogenetic  
4 relationships between the network based on character data and the tree that was constructed using  
5 distance methods (i.e., the NJ method). This was observed for the MCPH1 locus. A single mutational  
6 event can explain the allele distribution of the focal SNP rs930557 on the NJ tree but not the  
7 phylogenetic network (Fig. 1, Fig. 2). That is, haplotype *R* is separate from haplotypes *Q*, *S*, *T*, and *U*.  
8 The rationale of this contradiction can be explained as follows. First, the difference in selection  
9 pressure among haplotypes likely produced differences in LD length among them (Table s3). Then,  
10 the LD lengths of haplotypes with beneficial alleles became longer because of less frequent  
11 recombination than other haplotypes; EHH of the MCPH1 locus indicated that this is a selective  
12 sweep (Fig. 5a). Because the recombinant haplotypes carry a mixture of different ancestral  
13 information, the numbers of SNP sites that shared ancestry (synapomorphic SNPs) in the examined  
14 loci were inconsistent among haplotypes; that is, haplotypes with short EHH shared fewer  
15 synapomorphic SNPs than those with long EHH. This might produce systematic error when inferring  
16 phylogeny among haplotypes of a locus. Therefore, this inconsistency in evolutionary background  
17 among haplotypes results from the definition of loci that were uniformly determined by their  $r^2$   
18 values. Second, a phylogenetic network based on character data is thought to be more vulnerable  
19 than the distance method to inconsistency in LD length, because distance methods include a  
20 correction process with substitution models study (Kishino and Hasegawa 1989; Felsenstein and  
21 Churchill 1996), such as the F84 model in the present; this differs from the median network, which  
22 is based on character state without any weighting for synapomorphic SNPs.

23

## 24 Polymorphic Inversion

25 Among the loci in this study, the genomic region with a 900-kb inversion polymorphism at 17q21.31  
26 (17q21inv) had the most abundant accumulation of knowledge from previous studies. Previous  
27 studies showed that the inversions are found in a region where recombination was not observed  
28 around 2 Mb (Evans et al. 2004; Oliveira et al. 2004; Pittman et al. 2004; Fung et al. 2005). The  
29 17q21.31 region has been characterized as a region that is rich in chromosome rearrangements that  
30 are accompanied by segmental duplications (SDs), which frequently and repeatedly occurred during  
31 primate evolution (Zody et al. 2008). SDs play a critical role in chromosomal rearrangement during  
32 primate evolution (Bailey and Eichler 2006) (e.g., Shimada et al. 2005).

33 Because of frequent evolutionary changes, defining ancestral haplotype is not simple, and the  
34 evolutionary history of 17q21inv is still under debate (Alves et al. 2012; Steinberg et al. 2012). Zody  
35 et al. (2008) showed that the 17q21inv polymorphism is specific to the human lineage. Baker et al.  
36 (1999) named the common (non-inverted) haplotype H1 and the rare (inverted) haplotype H2.

1 According to the model proposed by Steinberg et al. (2012), the inverted orientation (H2 haplotype)  
2 was the ancestral state of the *Homo* lineage, and was replaced by the H1 haplotype, which emerged  
3 by (re-)inversion approximately 2.3 million years ago (Mya). This predominance of the H1  
4 haplotype is supported by the observation of this haplotype in Neanderthal (Green et al. 2010) and  
5 Denisovan genomes (Setó-Salvia et al. 2012), which was also supported by our results. Two studies  
6 that evaluated population genomics using SNP genotype data from worldwide populations focused  
7 on H1 (Steinberg et al. 2012) and H2 (Alves et al. 2015) haplotype families, and found that these  
8 haplotypes independently had African clusters that diverged first within each haplotype family. This  
9 indicates that both H1 and H2 haplotype families existed within Africa before OOA of modern  
10 humans (*H. sapiens*). Lack of reinforcement of African samples in our study may explain why the  
11 H2 haplotype family (haplotypes A–D) did not form a cluster that only consisted of Africans in our  
12 phylogenetic analysis. Therefore, these previous studies supported the idea that ancestral  
13 polymorphisms were maintained before the divergence of modern humans from the ancestral  
14 Neanderthals and Denisovans (topology types FA and Co, Fig. 3). Those previous studies also  
15 showed that copy number polymorphism of the SDs arose in the H1 and H2 lineages around 250,000  
16 years ago and 1.3 Mya, respectively, and named the haplotypes based on haplotype family and  
17 presence/absence of SDs. For example, H1' and H1D represent haplotypes without and with SDs of  
18 the H1 lineage, respectively. Alves et al. (2015) showed that North Africans have more H2D than  
19 H2' that is closer proportion to non-Africans, but rare H2D in Sub-Saharan Africa in which H2' form  
20 deepest monophyletic clade; this indicated that H2' was maintained within Sub-Saharan Africa  
21 during OOA of modern humans. Furthermore, Alves et al. (2015) also demonstrated negative trends  
22 of Tajima's D (Tajima 1989) in both H1 and H2 lineages, although H1 is more variable than H2 in  
23 nucleotide diversity. This deviation from neutrality for both the H1 and H2 lineages challenge the  
24 possibility of selective sweep on H2, although the authors carefully discussed that this was a  
25 speculative suggestion, and they did not specify if demography or positive selection was the cause of  
26 current geographic patterns.

27 Generally, a demographic event does not affect only a single locus. Our EHH analysis does not  
28 suggest a selective sweep in the H2 lineage or any notable difference between the two haplotypes.  
29 Considering restrictions in recombination between inverted and non-inverted haplotype families, the  
30 negative trends of Tajima's D can be explained by each haplotype family acting like a genetic barrier,  
31 which divided haplotypes and resulted in a smaller effective population size and longer LD than  
32 other loci; this likely indicates a population just after admixture of two divided populations. Our  
33 study indicated that the current distribution of H2 haplotypes is irrelevant to contact with  
34 Neanderthals and/or Denisovans. Additionally, we suggest that introgression from other unknown  
35 ancestral humans is not necessarily required to explain haplotype distributions at the 17q21inv locus.  
36 Consequently, as a more likely scenario, long-lasting ancestral polymorphisms with restricted

1 recombination between the two haplotype families probably resulted in the topology type Co  
2 haplotype phylogeny, although one basal bifurcated cluster (H2 cluster) only consisted of Eurasia,  
3 probably because of the loss of haplotype variation from Africa and archaic humans or insufficient  
4 sampling.

5

## 6 Distinguishing Introgression and ILS

7 To date, efforts have been made to distinguish introgression after hybridization and ILS of ancestral  
8 polymorphisms (Joly et al. 2009; Kubatko 2009; Meng and Kubatko 2009; Green et al. 2010; Gerard  
9 et al. 2011; Nakhleh 2013; Yu et al. 2014; Martin et al. 2015; Zhou et al. 2017; Edelman et al. 2019;  
10 Kubatko and Chifman 2019). Those studies evaluated tree topology, divergence time, and  
11 geographic distribution of alleles/haplotypes (Table s5). Based on those lines of evidence, these prior  
12 studies represented three approaches.

13 The first is a genealogy-based approach. This approach was used by Joly et al. (2009), who focused  
14 on the relationship between gene trees and species/population tree. In particular, the expectation of  
15 minimum divergence between two haplotypes is smaller for the hybridization model than that for  
16 ILS (Joly et al. 2009, Fig1). Through simulation and empirical application, they demonstrated that  
17 the detection power of hybridization is reduced in larger population sizes and shorter sequences; this  
18 provided incentive for our comparison among loci that were as long as possible based on the  
19 common data set of the 1000 Genomes Project (see ‘How to Treat Locus’).

20 The second approach is an allele frequency spectrum-based approach that focused on relative allele  
21 frequency of shared derived alleles in four taxa, and uses D statistics or ABBA test (Green et al.  
22 2010; Martin et al. 2015).

23 The third approach is a geographic information-based approach that uses information about habitat  
24 changes during subdivision and migration of populations/species to estimate gene flow. Estimates of  
25 historical change of habitats using ecological modeling tools (e.g., MaxEnt; Elith et al. 2011) are  
26 combined with estimates of demographic modeling performed by the coalescent-based  
27 isolation-with-migration model (Hey and Nielsen 2004) or admixture analysis using STRUCTURE  
28 (Hubisz et al. 2009), which is typically used to compare sympatric and allopatric populations (e.g.,  
29 Zhou et al. 2017).

30 The present study proposes that haplotype-based  $S^*$  analysis combined with categorization of tree  
31 topology is a simple and model-free method to identify introgression from ancient humans with  
32 fewer assumptions. It is assumed that Eurasians must be a subpopulation of Africans (a reference  
33 population) under the OOA model; this means that all original or closely related haplotypes of the  
34 OOA population (Eurasian) should remain in Africa today and included in the reference population  
35 of  $S^*$  analysis through vast sampling with a sufficient sample size. If these conditions are not  
36 fulfilled, a false positive  $S^*$  signal might occur.

1 Haplotype tree topology alone cannot distinguish ILS and introgression, as observed in tree types FE,  
2 FA, and Co (Fig. 3). However, the Eurasian haplotypes with high  $S^*$  scores clustered with ancient  
3 haplotypes, which strongly suggested introgression from ancient humans in the case of type FE (Fig.  
4 3); this may be applicable to Neanderthal branching in loci *dys44*, *RRM2P4*, and *OAS* (Fig. 1).  
5 Although the Neanderthal haplotype first coalesced with the high  $S^*$ -score cosmopolitan cluster in  
6 *STAT2*, the Neanderthal haplotype was not included in the cluster, as shown in other loci classified  
7 as type FE (Fig. 1). This could be explained by introgression occurring just after OOA before  
8 divergence between Europeans and Asians if the assumption regarding sample size of reference  
9 population is fulfilled. If the assumption is not fulfilled, a high  $S^*$  score in the reference population  
10 that underwent ancient subdivision in Africa can produce a false positive regarding absence of  
11 African sister haplotypes of the Eurasian haplotypes. Because Eurasians are not involved with  
12 introgression focused in discrimination within type FA, our application of  $S^*$  analysis does not  
13 distinguish between “introgression from known archaic to modern Africans” (Fig. 3, left of FA) and  
14 “ILS of ancient polymorphisms within Africa” (Fig. 3, right of FA).

15 In the outermost clusters A and B of the locus *Xp11hs*, Eurasian haplotypes with high  $S^*$  scores  
16 clustered together with the five haplotypes belonging the African reference population (type Co, Fig.  
17 3). This aberrant clustering of  $S^*$  and reference haplotypes might be explained by these five African  
18 haplotypes representing a small proportion of the all 377 African haplotypes used as reference in  $S^*$   
19 calculation. The individuals of the five African haplotypes included both East and West Africans  
20 (Tables s6–8); this may indicate that ancient polymorphisms persisted before subdivision between  
21 East and West Africans. Further simulation-based study that focuses on these two scenarios is needed  
22 for this tree type.

23 A high  $S^*$  score at the basally diverged Eurasian lineage under the topology type Ea clearly indicates  
24 introgression from unknown archaic hominins in Eurasia (Fig. 3). This pattern was partially found in  
25 the locus *STAT2* and is consistent with the following published scenario that explains an observation  
26 that African genomes shared more derived alleles with the Neanderthal genome than with the  
27 Denisovan genome: “Denisovans received gene flow from ancestors that were deeply diverged from  
28 common ancestors among Neanderthals, Denisovans, and modern humans” (Prufer et al. 2014).

29 The gene tree type Af under the conventional population tree [(archaic, (South African, (East African,  
30 Eurasian)))] indicates introgression from ancestral Eurasians to known archaic hominins (Fig. 3, left  
31 of Af). If the conventional population tree is not assumed, another scenario can be considered for  
32 type Af: ancient subdivision within Africa before the leaving of Neanderthals from Africa (Fig. 3,  
33 right of Af). This ancient subdivision model assumes ancient population structure that persisted  
34 before divergence of the ancestral Neanderthal population until OOA of modern humans (Fig. 3,  
35 right of Af; cf., Green et al. (2010), Fig. 6; Wall et al, (2013), Fig. 1a). This model is not supported  
36 by previous studies (Sankararaman et al. 2012; Yang et al. 2012; Wall et al. 2013). In this study, the

1 MCPH1 and HYAL loci were classified into type Af. Although low stability of relationships among  
2 major clusters prevents a conclusive statement (Table s1), cluster *O* in the MCPH1 gene tree  
3 revealed that Neanderthal and Denisovan haplotypes exhibited monophyly and exclusively clustered  
4 with modern Asian (Fig. 1). Because the Neanderthal sequence originated from the Altai Mountains,  
5 which are geographically close to the sampling location of Denisovans, cluster *O* indicated gene  
6 flow between ancestral modern Asians and these two ancient hominins within a limited area of Asia.  
7 The direction of gene flow depends on the assumed population tree or model. Given the  
8 conventional population tree model, gene flow from modern Asians to these archaic hominins is  
9 reasonable. However, reverse gene flow was concluded under the ancient subdivision in the Africa  
10 model. This consideration necessitates further empirical studies.

11 As discussed above,  $S^*$  analysis based on gene trees is valuable for distinguishing ILS and  
12 introgression in at least some cases. However, researchers must be cautious when selecting reference  
13 populations. Our modification of  $S^*$  based on rare/minor alleles assume that the African population  
14 represents universal human variation. Thus, insufficient sampling from African populations and  
15 extinction of ancestral African populations produces false positive  $S^*$  scoring, which may especially  
16 occur when highly diverged population structure existed before OOA. For example, rare haplotypes  
17 that existed in East Africa via ILS before OOA may show a false high  $S^*$  score if the rare haplotypes  
18 were included in OOA migrating population but were not included in the reference population in the  
19  $S^*$  analysis. Our obtained high  $S^*$  scores of the H2 haplotype in the 17q21inv locus (Fig. 2) can be  
20 explained by no sampling of H2 Africans in this study, unlike Alves et al. (2015), and high  
21 colocalization of H1 and H2 within Eurasia, because of restricted recombination between H1 and H2  
22 chromosomes.

23

#### 24 How to Treat "Locus"

25 We defined the "locus" as a LD region that was determined using the whole sample set of the 1000  
26 Genomes Project. The concept of "locus" is operational and should be carefully treated in situations  
27 where genome-wide massive sequence data are available. We propose re-defining locus as a smaller  
28 LD region prior to phylogenetic analysis if specific haplogroups are disproportionately selected  
29 compared with others.

30 EHH analysis that focuses on an SNP can distinguish interesting haplogroups, such as those with  
31 unusual divergence, should be effective for identifying selection pressure only a specific allele.  
32 Moreover, EHH can display selection pressure differences within a genomic region as a density of  
33 bifurcation of haplotype lineages, as we showed. This is also effective for identifying differences in  
34 selection pressure among haplotypes that affect LD length. When the effect of heterogeneous  
35 selection is removed, the impact of variation in LD length by recombination alone becomes smaller,  
36 which facilitates phylogenetic analysis.

1 To estimate the actual effect of recombinants on phylogenetic analysis, we reviewed the position on  
2 our gene tree of haplotypes that corresponded to recombinants that were identified and removed  
3 from the phylogenetic analysis in the previous study on the HYAL locus, although our method that  
4 used imputation and phasing processes differed from the previous study (Ding et al. 2013). Contrary  
5 to expectation, we did not find that all of those haplotypes were located on long branches or  
6 separated from the other closely related haplotypes without recombination (Brown diamond in Fig.  
7 s5). Among the haplogroups that suggested recombination by forming a parallelogram in the  
8 phylogenetic network (i.e., haplogroups *CDE*, *IJK*, *NOT*, *ABS*), two haplogroups, *D* in *CDE* and *O*  
9 in *NOT*, contained haplotypes that corresponded to recombinants in the previous study (Fig. 2). Thus,  
10 this indicates that the effect on recombination is not serious, and a massive sequence data set can be  
11 analyzed without removing all recombinant candidates. In this situation, a phylogenetic network can  
12 reveal recombination events among haplotypes as large parallelograms (Fig. 2).

13

## 14 Materials and Methods

### 15 Data

16 We downloaded VCF and index (.tbi) files of chromosomes from the ftp site of the 1000 Genomes  
17 Project (<ftp://ftp.1000genomes.ebi.ac.uk/>; The 1000 Genomes Project Consortium 2015). The version  
18 of the VCF files was Phase 1 Version 3. Phasing for diploid autosomes was conducted in ShapeIt2.  
19 The file names include chromosome names and version information,  
20 “SHAPEIT2\_integrated\_phase1\_v3.20101123.snps\_indels\_svsvs.genotypes.all.vcf.gz” for autosome,  
21 and “phase1\_release\_v3.20101123.snps\_indels\_svsvs.genotypes.all.vcf.gz” for the X chromosome.  
22 The data contained 1,092 individuals from 14 populations (The 1000 Genomes Project Consortium  
23 2012) (Table s2). The “American” samples used in the 1000 Genomes Project were determined to  
24 represent admixture of various North Americans that were more closely related to Africans than  
25 Native Americans (The 1000 Genomes Project Consortium 2012).

26

### 27 Definition of Loci

28 We selected eight loci that contained candidate haplotypes for introgression according to the  
29 following criteria. First, the genomic regions were previously reported to include candidate  
30 haplotypes for which OOA cannot explain their divergence and/or geographic distribution pattern.  
31 Second, the sequence and genome coordinates of the candidate haplotype for introgression could be  
32 clearly detected based on the description in each previous paper.

33

34 Selection of focal haplotypes and SNPs:



1 We manually inspected haplotype sequences reported by previous studies. Based on this inspection,  
2 we determined the most diverged haplotype as a haplotype of interest (focal haplotype) and an SNP  
3 site that specifically discriminated the focal haplotype (focal SNP) for each locus. When a LD block  
4 was not determined because of small minor allele count of the focal SNP, we selected focal  
5 haplotypes that represented exceptions to the OOA model in previous studies.

6

7 LD region determination:

8 We calculated the  $r^2$  values for all combinations of SNPs that existed within 200 kb in both  
9 directions of the ancient haplotype regions using data downloaded from the 1000 Genomes Project;  
10 for this, we used VCFtools with the --hap-r2 optional command (Danecek et al. 2011). We extracted  
11 SNPs that were closely associated (i.e.,  $r^2 \geq 0.8$ ) with the focal SNP. We defined these LD regions as  
12 loci to be examined (Table 1).

13 In the application of our method to the 17q21inv locus, a genomic region with high LD (i.e.,  $r^2 \geq$   
14 0.8) was further examined to clarify the state of duplication within the LD region. The distribution of  
15  $r^2$  values within the LD region over 17q21 was divided into clusters according to a density-based  
16 clustering algorithm, Density Reachability And Connectivity Clustering (Ester et al. 1996), using fpc  
17 in the R library with the parameters  $\epsilon=50000$  and MinPts=50 (Hennig 2019). Based on the results of  
18 chr17:43654468–44369518, we eliminated the region that showed duplication and finally obtained  
19 chr17:43654468–44205122 as the region to be further analyzed. Consequently, the defined genomic  
20 region did not include the known and intensively focused SD that segregates sub-haplotype H2D in  
21 the H2 haplotype and H1D in the H1 haplotype (see Discussion).

22

## 23 Data Validation

24 Data cleaning and re-genotyping:

25 The obtained VCF files were trimmed according to the definition of loci. Because the VCF files  
26 contained regions with a short read-depth, we conducted a pilot investigation into whether  
27 base-calling of the VCF files might be improved by manual comparison with raw data (i.e.,  
28 base-calling and quality values in BAM files) for five individuals per locus. This pilot study showed  
29 inconsistency between base-calling in VCF and quality in BAM, and insight into base-calling based  
30 on the quality values of read sequences.

31 Although the base and phase information of variant sites in VCF files that were congruent with raw  
32 data in BAM files were used for further analysis, we rewrote the VCF files to prioritize our  
33 observation of the raw data in the BAM file if there were inconsistencies among data sources.

34 The BAM files and index files for the target genomic regions were downloaded from the same ftp  
35 site for the VCF files mentioned earlier (<ftp://ftp.1000genomes.ebi.ac.uk/>; The 1000 Genomes Project  
36 Consortium 2015) using our in-house programs.

1 We eliminated information of reads described in the BAM files if there were more than two  
2 mismatches to the reference genome within 10 bases by replacing the base call to “N” and the  
3 quality value to “0”. We discarded PCR and optical duplicate reads.

4 We calculated quality values of the variant site described in the VCF files by combining quality  
5 values or read sequences obtained from the BAM files according to the algorithm in a program  
6 (ConstructAnalysis.py) developed by Brad Chapman  
7 (<https://bitbucket.org/chapmanb/synbio/src/7b1b3a972b7e/SynBio/Sequencing/>). See supplementary  
8 document for detailed information.

11  
12 Imputation and re-phasing:

13 Insertion and deletion (indel) sites in the VCF files, which were re-genotyped as necessary, were  
14 separated. Excluding those data, we divided the individual data in VCFs based on whether they  
15 contained unphased or missing sites. Then, imputation against missing base-call values was  
16 performed for each phased and unphased file followed by re-phasing using Beagle 3.3.2 (Browning  
17 and Browning 2007). Each result of the imputation was incorporated into the VCF file. Here, for  
18 heterozygous sites in Beagle output, we compared the phase of the heterozygous site with those of  
19 the neighboring three consecutive heterozygous sites. When the phases of these three sites did not  
20 match, the phase of the heterozygous site was recorded as ‘unknown phase.’ Otherwise, the phase  
21 assumed by Beagle was used for the new VCF file. To reduce such unknown information, we  
22 repeated imputation and re-phasing in Beagle using the obtained VCF file. Then, we confirmed that  
23 the renewed VCF contained fewer ‘missing’ bases and ‘unphased’ chromosomes (Table s4).

24  
25 Gene genealogy analysis of haplotypes

26 See supplementary document for information about preparation of sequences of Neanderthal,  
27 Denisovan, and chimpanzee.

28  
29 NJ tree and bootstrapping:

30 In the VCF files, we evaluated and corrected base-calling and phasing for the 1000 genomes, Altai  
31 Neanderthal, Denisovan, and chimpanzee were combined into one VCF file that included indel site  
32 information. Based on the variant information of the VCF files, nonredundant haplotype sequences  
33 were generated after removal of sequence data with 0.5% or more deleted sites in length.

34 With these haplotype sequence data for each locus, we constructed NJ trees (Saitou and Nei 1987)  
35 and added bootstrap values using a bash shell script, fasta2trebs.bsh, which automatically executes  
36 PHYLIP Dnadist for distance calculation between haplotypes under the F84 model of nucleotide  
37 substitution (Kishino and Hasegawa 1989; Felsenstein and Churchill 1996); PHYLIP Neighbor for  
38 NJ tree construction; and PHYLIP Seqboot for bootstrapping (using 500 iterations for each locus for

1 this study) (Felsenstein 1989). This technique was previously published (Shimada and Nishida  
2 2017).

3 We partially executed data validation of VCF files and NJ tree construction on the NIG  
4 supercomputer at ROIS National Institute of Genetics (Mashima et al. 2017).

5

6 Phylogenetic Network:

7 Selection of Operational Taxonomic Units for the Phylogenetic Network:

8 To clarify the phylogenetic relationships among clusters shown on the NJ trees, we constructed a  
9 phylogenetic network with selected operational taxonomic units (OTUs) that represent each cluster  
10 of the NJ tree. Therefore, we developed an algorithm to select a small number (14–21 in this study)  
11 of OTUs and preferably maintain relationships among clusters without bias and arbitrariness. The  
12 algorithm includes the following two steps. First, OTUs were selected that comprehensively and  
13 homogeneously maintained their distances from each other. Second, OTUs with extraordinary  
14 distances from the root of each NJ tree were added to the OTUs selected in the first step. The  
15 in-house programs for these steps are available at an open repository ([URL will be public after  
16 acceptance of the manuscript.](#)) Briefly, the first program, `tree_cluster.pl`, determined the candidates  
17 of representative clusters and representative OTUs for the clusters. Then, the candidates of  
18 representative clusters were removed according to the distance to the neighboring candidate clusters.  
19 The removal steps were repeated until the number of candidate clusters reached the upper limit that  
20 was previously determined (parameter settings are provided in Table s1).

21 The second program, `check_tree.pl`, detected OTUs with extraordinary distance from the root of the  
22 NJ trees and added them to the OTUs that represented clusters in the first step. The haplotype  
23 sequences without indel sites of these selected OTUs and the two archaic hominins were saved as  
24 VCF files.

25

26 Construction of the Phylogenetic Network:

27 The VCF file was transformed into an RDF file using an in-house perl script. Another VCF file with  
28 chimpanzee data was also used to check root position. We constructed a Reduced Median Network  
29 (Bandelt et al. 1995) with these RDF files using the free software Network 4.6  
30 (<http://fluxus-engineering.com>). When too many parallelograms make it difficult to visualize and  
31 interpret, we adjusted the reduction threshold to reduce unnecessary median vectors and links by  
32 manual testing according to the user guide document (parameter settings are provided in Table s1).

33

34 S\* analysis

35 We conducted S\* analysis that was originally devised for analyses with a small number of  
36 individuals, such as 20 (Plagnol and Wall 2006). Later, Vernot et al. (Vernot and Akey 2014; Vernot

1 et al. 2016) extended this approach so it could be applied to a large number of individuals, and added  
2 a step to statistically quantify the matching between a candidate haplotype for introgression and an  
3 archaic haplotype. These previous  $S^*$  calculation methods (Plagnol and Wall 2006; Vernot et al.  
4 2016) were assumed to use non-phased data. Because we used phased data, we modified the original  
5  $S^*$  method (Plagnol and Wall 2006) so that it could be applied to phased haplotype data, including  
6 missing alleles, and was based on allele distance of a haplotype and not genotype distance on a  
7 non-African individual. To avoid obscuring the possibility of introgression from unknown archaic  
8 hominins by overemphasis of known archaic hominins, we simply displayed the haplotypes that  
9 deviated from the OOA model with classification by intensity of  $S^*$  score and without quantification  
10 of matching to available archaic sequences.

11 We defined the reference population as the African populations LWK, YRI, and ASW (Table s2). We  
12 selected SNP sites with minor alleles observed in non-African haplotypes and allele frequencies in  
13 African less than 5% for use in  $S^*$  calculation; this was to minimize the possibility of gene flow  
14 between non-African (target) and African (reference) populations. We separately calculated  $S^*$  for  
15 three target populations (European, Asian, and American). To calculate  $S^*$  of a haplotype, 100  
16 haplotypes were randomly selected from the same target population.

17

18 Algorithm:

19 We largely followed the sequence of steps for  $S^*$  calculation described in previous studies (Plagnol  
20 and Wall 2006; Vernot and Akey 2014). However, we calculated  $S^*$  by summing distances  $d_h(i,j)$   
21 between allele pairs of SNP sites  $i$  and  $j$  within haplotype  $h$ , and not genotype distance within a  
22 diploid individual. See supplementary documents for detailed algorithm.

23

24 Classification and display of  $S^*$  results on the phylogenetic tree/network:

25 To simplistically display  $S^*$  intensities on phylogenetic trees and networks, we classified  $S^*$  values  
26 into three classes in each locus. High and medium classes were defined as introgression grades I ( $T2$   
27  $\leq S^*$ ) and II ( $T1 \leq S^* < T2$ ), respectively. We first determined  $T1$  and  $T2$  in *dys44* and *RRM2P4* loci  
28 by visual observation of distribution of  $S^*$  values as  $T1_{dys44}=60000$ ,  $T2_{dys44}=80000$ ,  $T1_{RRM2P4}=40000$ ,  
29 and  $T2_{RRM2P4}=53333$ , respectively. We chose these two loci because they slightly overlap with genic  
30 regions. Thresholds for other loci were calculated by assuming a linear relationship between the  
31 thresholds and number of SNPs,  $N$ , in these two loci, *dys44* and *RRM2P4*, as follows:

33 
$$T1 = \frac{T1_{dys44} - T1_{RRM2P4}}{N_{dys44} - N_{RRM2P4}}N + \frac{T1_{RRM2P4}N_{dys44} - T1_{dys44}N_{RRM2P4}}{N_{dys44} - N_{RRM2P4}}$$

32 by assigning  $N_{dys44}=313$ ,  $N_{RRM2P4}=209$ , and the above-mentioned values,

34 
$$T1 = \frac{2500}{13}(N - 1)$$

1 The second threshold T2 was defined as,

3 
$$T2 = \frac{4}{3}T1$$

2

#### 4 EHH

5 We added ancestral allele information obtained from the UCSC genome browser to the VCF files,  
6 and we conducted data cleaning and re-imputation in Beagle 3.3.2 (Browning and Browning 2007).  
7 For the “rehh” R package (Gautier and Vitalis 2012), we generated two input files (i.e., for  
8 haplotypes and SNPs) from the VCF files with an inhouse perl program. We set a focal SNP site for  
9 EHH analysis as the same SNP site that was used to determine LD region. If multiple focal SNPs  
10 with perfect association (i.e.,  $r^2=1$ ) existed, a centrally located SNP was chosen. Because we applied  
11 the same criteria for choosing focal SNP sites for EHH analyses over all loci, the chosen SNP site  
12 was occasionally different from the “SNP for marker of introgressive haplotype” described in the  
13 original study, which happened at the HYAL locus; that is, rs116075629 was chosen instead of  
14 rs12488302 (Ding et al. 2013). We confirmed that the phylogenetic relationship of the HYAL  
15 haplotypes obtained in this study was equivalent to that in the original paper published by Ding et al.  
16 (2013), and this finding does not change the main argument regarding introgression from  
17 Neanderthals. We excluded haplotype data that contained many missing genotype sites by setting the  
18 `min_perc_genohap=99.999` option of `data2haplohh` in the `rehh` program. EHH calculation results  
19 were represented in EHH plots. EHH regions were defined as genomic regions with EHH values  $\geq$   
20 0.05 in both the ancestral and derived alleles of the focal SNPs. We also created a bifurcation graph  
21 within the regions with EHH values  $\geq 0.2$ . In the case of  $MAF < 0.1$ , the obtained results were only  
22 used to identify genomic regions with stronger constraints by SNP density differences within the  
23 EHH region without comparing alleles to investigate selective sweep (Table s3), because haplotypes  
24 with rare SNP variants tend to have less haplotype variation, which elongates EHH in bifurcation  
25 graphs irrespective of selection.

26

#### 27 Acknowledgments

28 We are grateful to Michiyo Murase; Tsutomu Kanesashi, PhD; and Chiaki Inoue for help with the  
29 analyses, and to Jody Hey, PhD, for comments on an earlier version of this manuscript. We  
30 appreciate Takeru Akazawa, PhD, for leading the Replacement of Neanderthals by Modern Humans  
31 (RNMH) project, Kenichi Aoki, PhD, for leading the B01 research team of the RNMH, Ryosuke  
32 Kimura, PhD, for constructive discussion, and all the members of the RNMH for helpful comments  
33 and encouragements. We thank Mallory Eckstut, PhD, from Edanz Group  
34 (<https://en-author-services.edanzgroup.com/>) for editing a draft of this manuscript. This research was

1 financially supported by the Ministry of Economy, Trade and Industry of Japan (METI), a  
2 Grant-in-Aid for Scientific Research on Innovative Areas (RNMH project 1201; Research in a  
3 proposed research area, Grant Number 23101506), JSPS the Grants-in-Aid for Scientific Research  
4 (C) (Grant Number 18K06452), and the Saito Gratitude Foundation to MKS.

5

## 6 Abbreviations:

7 extended haplotype homozygosity (EHH), incomplete lineage sorting (ILS), insertion and deletion  
8 (indel), linkage disequilibrium (LD), minor allele frequency (MAF), million years ago (Mya),  
9 neighbor-joining (NJ), out-of-Africa (OOA), operational taxonomic unit (OTU), genomic region  
10 length ratio of EHH to LD (*R.length*), segmental duplications (SDs), single nucleotide  
11 polymorphism (SNP)

12

## 13 Figure Legends

### 14 Figure 1:

15 NJ trees for haplotypes of modern humans and archaic hominins (Altai Neanderthals and  
16 Denisovans) of three representative loci. (A) MCPH1. (B) OAS. (C) HYAL. Sample origins of  
17 haplotypes are expressed by colors of branch tips. Haplotypes of archaic hominins and clusters  
18 shared across multiple continents are indicated by light green thick branches and black thin lines,  
19 respectively. Line thickness of branches within five bifurcations from the root indicates two classes  
20 of bootstrap values of the downward clusters (i.e., less than 50% (thin) and greater than or equal to  
21 50% (thick), respectively). Haplotypes with introgression grades defined by S\* analysis are marked  
22 by dark red (high) and pale blue (medium). Clusters where one representative haplotype was  
23 selected for network analysis are shown in capital letters. Derived allele distributions of focal SNPs  
24 in representative haplotypes are depicted by blue background color. When the focal SNP is different  
25 from the SNP representing an unusually diverged haplotype reported by the original study, the  
26 distribution of the focal SNP from the original study is shown in brown background (see Materials  
27 and Methods for details).

28

### 29 Figure 2:

30 Phylogenetic network of major haplotypes representing major phylogenetic clusters for eight loci. I:  
31 Xp11hs, II: dys44, III: RRM2P4, IV: MCPH1, V: 17q21inv, VI: STAT2, VII: OAS, VIII: HYAL.  
32 These haplotypes were selected from major clusters of the NJ tree to avoid bias in each locus (see  
33 Materials and Methods for details). The color and thickness of frames surrounding haplotypes  
34 indicates bootstrap values and distances (i.e., number of bifurcations from the root point) of the

1 clusters in the NJ trees. Distribution of derived alleles of focal SNPs and edges bearing focal SNPs  
2 are depicted by the blue area and pink line, respectively.

### 3 **Figure 3:**

4 Expected patterns of haplotype genealogy under models without recombination or contamination. A:  
5 African cluster, E: Eurasian cluster, †: known archaic haplotype found in Eurasia,  $\phi$ : unknown  
6 archaic haplotype.

7 Type Fo: Recent Out-of-Africa (OOA) without incomplete lineage sorting (ILS); type FE:  
8 introgression from known archaic hominins to Eurasians after recent OOA and ILS; type FA:  
9 introgression from known archaic hominins to Africa, and ancient polymorphisms within Africa;  
10 type Af: introgression from ancestral Eurasians to known archaic hominins, and subdivision within  
11 Africa before OOA for both archaic hominins and modern humans (cf., Green et al. 2010, Fig. 6);  
12 type Ea: introgression from unknown archaic hominins to Eurasians; type Co: introgression from  
13 unknown archaic hominins to an ancestral population prior to OOA, and ancient polymorphism  
14 within Africa before OOA for both archaic hominins and modern humans followed by ILS.

### 15 **Figure 4:**

16 Comparison between LD and EHH regions. Comparison of (A) length and (B) SNP density. Bars for  
17 regions and red plots for EHH/LD ratio graphed against left and right vertical axis, respectively.

### 18 **Figure 5:**

19 EHH analysis for MCPH1. (A) EHH plot of MCPH1. EHH are plotted in the genomic region  
20 showing EHH < 0.05 in at least one allele. Red and blue lines indicate EHH for ancestral (Anc) and  
21 derived (Der) alleles, respectively. The bifurcation graphs were generated within the region showing  
22 EHH > 0.2 (aqua green line) in both alleles. (B, C) Bifurcation graphs for the MCPH1 locus. The  
23 position of the focal SNP site is shown by blue dotted lines. The width of blue lines represents the  
24 frequency of haplotypes bearing derived (B) and ancestral (C) alleles of each focal SNP. Red lines in  
25 (C) indicate SNP positions that make bifurcations at multiple branches. EHH analysis of other loci is  
26 shown in Supplementary Figure s4.

27

## 28 **References**

- 29 Alves JM, et al. 2015. Reassessing the Evolutionary History of the 17q21 Inversion Polymorphism.  
30 *Genome Biol Evol* 7: 3239-3248. doi: 10.1093/gbe/evv214  
31 Alves JM, Lopes AM, Chikhi L, Amorim A 2012. On the Structural Plasticity of the Human  
32 *Genome: Chromosomal Inversions Revisited. Curr Genomics* 13: 623-632. doi:  
33 10.2174/138920212803759703  
34 Bailey JA, Eichler EE 2006. Primate Segmental Duplications: Crucibles of Evolution, Diversity and  
35 Disease. *Nat Rev Genet* 7: 552-564.

- 1 Baker M, et al. 1999. Association of an Extended Haplotype in the Tau Gene with Progressive  
2 Supranuclear Palsy. *Hum Mol Genet* 8: 711-715. doi: 10.1093/hmg/8.4.711
- 3 Bandelt HJ, Forster P, Sykes BC, Richards MB 1995. Mitochondrial Portraits of Human Populations  
4 Using Median Networks. *Genetics* 141: 743-753.
- 5 Browning SR, Browning BL 2007. Rapid and Accurate Haplotype Phasing and Missing-Data  
6 Inference for Whole-Genome Association Studies by Use of Localized Haplotype Clustering.  
7 *Am J Hum Genet* 81: 1084-1097. doi: 10.1086/521987
- 8 Campbell MC, Tishkoff SA 2010. The Evolution of Human Genetic and Phenotypic Variation in  
9 Africa. *Curr Biol* 20: R166-R173. doi: 10.1016/j.cub.2009.11.050
- 10 Cox MP, et al. 2008. Testing for Archaic Hominin Admixture on the X Chromosome: Model  
11 Likelihoods for the Modern Human Rrm2p4 Region from Summaries of Genealogical Topology  
12 under the Structured Coalescent. *Genetics* 178: 427-437. doi: 10.1534/genetics.107.080432
- 13 Danecek P, et al. 2011. The Variant Call Format and Vcftools. *Bioinformatics* 27: 2156-2158. doi:  
14 btr330  
15 10.1093/bioinformatics/btr330
- 16 Dannemann M, Kelso J 2017. The Contribution of Neanderthals to Phenotypic Variation in Modern  
17 Humans. *Am J Hum Genet* 101: 578-589. doi: 10.1016/j.ajhg.2017.09.010
- 18 Dannemann M, Racimo F 2018. Something Old, Something Borrowed: Admixture and Adaptation in  
19 Human Evolution. *Curr Opin Genet Dev* 53: 1-8. doi: 10.1016/j.gde.2018.05.009
- 20 Ding Q, et al. 2013. Neanderthal Introgression at Chromosome 3p21.31 Was under Positive Natural  
21 Selection in East Asians. *Mol Biol Evol* 31: 683-695. doi: 10.1093/molbev/mst260
- 22 Donnelly MP, et al. 2010. The Distribution and Most Recent Common Ancestor of the 17q21  
23 Inversion in Humans. *Am J Hum Genet* 86: 161-171. doi: 10.1016/j.ajhg.2010.01.007
- 24 Edelman NB, et al. 2019. Genomic Architecture and Introgression Shape a Butterfly Radiation.  
25 *Science* 366: 594-599. doi: 10.1126/science.aaw2090
- 26 Elith J, et al. 2011. A Statistical Explanation of Maxent for Ecologists. *Divers Distrib* 17: 43-57. doi:  
27 10.1111/j.1472-4642.2010.00725.x
- 28 Enard D, Petrov DA 2018. Evidence That Rna Viruses Drove Adaptive Introgression between  
29 Neanderthals and Modern Humans. *Cell* 175: 360-371.e313. doi: 10.1016/j.cell.2018.08.034
- 30 Ester M, Kriegel H-P, Sander J, Xu X. 1996. A Density-Based Algorithm for Discovering Clusters in  
31 Large Spatial Databases with Noise. In: Simoudis E, Han J, Fayyad Um, editors. *Proceedings*  
32 *of the Second International Conference on Knowledge Discovery and Data Mining (Kdd-96)*.  
33 Palo Alto: AAAI Press. p. 226–231.
- 34 Evans PD, et al. 2006. Evidence That the Adaptive Allele of the Brain Size Gene Microcephalin  
35 Introgressed into Homo Sapiens from an Archaic Homo Lineage. *P Natl Acad Sci USA* 103:  
36 18178-18183. doi: 10.1073/pnas.0606966103



- 1 Evans W, et al. 2004. The Tau H2 Haplotype Is Almost Exclusively Caucasian in Origin. *Neurosci*  
2 *Lett* 369: 183-185. doi: S0304-3940(04)01049-3  
3 10.1016/j.neulet.2004.05.119
- 4 Felsenstein J 1989. Phylip - Phylogeny Inference Package (Version 3.2). *Cladistics* 5: 164-166.
- 5 Felsenstein J, Churchill GA 1996. A Hidden Markov Model Approach to Variation among Sites in  
6 Rate of Evolution. *Mol Biol Evol* 13: 93-104.
- 7 Fu Q, et al. 2014. Genome Sequence of a 45,000-Year-Old Modern Human from Western Siberia.  
8 *Nature* 514: 445-449.
- 9 Fung HC, et al. 2005. The Architecture of the Tau Haplotype Block in Different Ethnicities.  
10 *Neurosci Lett* 377: 81-84. doi: S0304-3940(04)01487-9  
11 10.1016/j.neulet.2004.11.072
- 12 Garrigan D, et al. 2005a. Deep Haplotype Divergence and Long-Range Linkage Disequilibrium at  
13 Xp21.1 Provide Evidence That Humans Descend from a Structured Ancestral Population.  
14 *Genetics* 170: 1849-1856. doi: 10.1534/genetics.105.041095
- 15 Garrigan D, et al. 2005b. Evidence for Archaic Asian Ancestry on the Human X Chromosome. *Mol*  
16 *Biol Evol* 22: 189-192. doi: 10.1093/molbev/msi013
- 17 Gautier M, Vitalis R 2012. Rehh: An R Package to Detect Footprints of Selection in Genome-Wide  
18 Snp Data from Haplotype Structure. *Bioinformatics* 28: 1176-1177. doi: bts115  
19 10.1093/bioinformatics/bts115
- 20 Gerard D, Gibbs HL, Kubatko L 2011. Estimating Hybridization in the Presence of Coalescence  
21 Using Phylogenetic Intraspecific Sampling. *BMC Evol Biol* 11: 291. doi: 1471-2148-11-291  
22 10.1186/1471-2148-11-291
- 23 Green RE, et al. 2010. A Draft Sequence of the Neandertal Genome. *Science* 328: 710-722. doi:  
24 10.1126/science.1188021
- 25 Hardy J, et al. 2005. Evidence Suggesting That Homo Neanderthalensis Contributed the H2 Mapt  
26 Haplotype to Homo Sapiens. *Biochem Soc T* 33: 582-585. doi: BST0330582  
27 10.1042/BST0330582
- 28 Harris AM, Michael D 2017. Admixture and Ancestry Inference from Ancient and Modern Samples  
29 through Measures of Population Genetic Drift. *Hum Biol* 89: 21-46. doi:  
30 10.13110/humanbiology.89.1.02
- 31 Hennig C. 2019. Fpc: Flexible Procedures for Clustering.
- 32 Hey J, Nielsen R 2004. Multilocus Methods for Estimating Population Sizes, Migration Rates and  
33 Divergence Time, with Applications to the Divergence of *Drosophila Pseudoobscura* and *D.*  
34 *Persimilis*. *Genetics* 167: 747-760.
- 35 Hubisz MJ, Falush D, Stephens M, Pritchard JK 2009. Inferring Weak Population Structure with the  
36 Assistance of Sample Group Information. *Mol Ecol Resour* 9: 1322-1332. doi:

- 1 10.1111/j.1755-0998.2009.02591.x
- 2 Huson DH, Bryant D 2006. Application of Phylogenetic Networks in Evolutionary Studies. *Mol Biol*  
3 *Evol* 23: 254-267. doi: 10.1093/molbev/msj030
- 4 Jinam TA, et al. 2017. Discerning the Origins of the Negritos, First Sundaland People: Deep  
5 Divergence and Archaic Admixture. *Genome Biol Evol* 9: 2013-2022. doi: 10.1093/gbe/evx118
- 6 Joly S, McLenachan PA, Lockhart PJ 2009. A Statistical Approach for Distinguishing Hybridization  
7 and Incomplete Lineage Sorting. *Am Nat* 174: E54-E70. doi: 10.1086/600082
- 8 Kishino H, Hasegawa M 1989. Evaluation of the Maximum Likelihood Estimate of the Evolutionary  
9 Tree Topologies from DNA Sequence Data, and the Branching Order in Hominoidea. *J Mol Evol*  
10 29: 170-179. doi: 10.1007/bf02100115
- 11 Kubatko LS 2009. Identifying Hybridization Events in the Presence of Coalescence Via Model  
12 Selection. *Syst Biol* 58: 478-488. doi: 10.1093/sysbio/syp055
- 13 Kubatko LS, Chifman J 2019. An Invariants-Based Method for Efficient Identification of Hybrid  
14 Species from Large-Scale Genomic Data. *BMC Evol Biol* 19: 112. doi:  
15 10.1186/s12862-019-1439-7
- 16 Kuhlwilm M, et al. 2016. Ancient Gene Flow from Early Modern Humans into Eastern Neanderthals.  
17 *Nature* 530: 429. doi: 10.1038/nature16544
- 18 Lipson M, Reich D 2017. A Working Model of the Deep Relationships of Diverse Modern Human  
19 Genetic Lineages Outside of Africa. *Mol Biol Evol* 34: 889-902. doi: 10.1093/molbev/msw293
- 20 Mallick S, et al. 2016. The Simons Genome Diversity Project: 300 Genomes from 142 Diverse  
21 Populations. *Nature* 538: 201-206. doi: 10.1038/nature18964
- 22 Martin SH, Davey JW, Jiggins CD 2015. Evaluating the Use of Abba-Baba Statistics to Locate  
23 Introgressed Loci. *Mol Biol Evol* 32: 244-257. doi: 10.1093/molbev/msu269
- 24 Mashima J, et al. 2017. DNA Data Bank of Japan. *Nucleic Acids Res* 45. doi: 10.1093/nar/gkw1001
- 25 Mendez FL, Watkins JC, Hammer MF 2012a. Global Genetic Variation at *Oas1* Provides Evidence  
26 of Archaic Admixture in Melanesian Populations. *Mol Biol Evol* 29: 1513-1520. doi:  
27 10.1093/molbev/msr301
- 28 Mendez FL, Watkins JC, Hammer MF 2012b. A Haplotype at *Stat2* Introgressed from Neanderthals  
29 and Serves as a Candidate of Positive Selection in Papua New Guinea. *Am J Hum Genet* 91:  
30 265-274. doi: 10.1016/j.ajhg.2012.06.015
- 31 Mendez FL, Watkins JC, Hammer MF 2013. Neandertal Origin of Genetic Variation at the Cluster of  
32 *Oas* Immunity Genes. *Mol Biol Evol* 30: 798-801. doi: mst004  
33 10.1093/molbev/mst004
- 34 Meng C, Kubatko LS 2009. Detecting Hybrid Speciation in the Presence of Incomplete Lineage  
35 Sorting Using Gene Tree Incongruence: A Model. *Theor Popul Biol* 75: 35-45. doi:  
36 S0040-5809(08)00111-1

- 1 10.1016/j.tpb.2008.10.004
- 2 Meyer M, et al. 2012. A High-Coverage Genome Sequence from an Archaic Denisovan Individual.  
3 Science 338: 222-226. doi: 10.1126/science.1224344
- 4 Mondal M, et al. 2016. Genomic Analysis of Andamanese Provides Insights into Ancient Human  
5 Migration into Asia and Adaptation. Nat Genet 48: 1066. doi: 10.1038/ng.3621
- 6 Nakhleh L 2013. Computational Approaches to Species Phylogeny Inference and Gene Tree  
7 Reconciliation. Trends Ecol Evol 28: 719-728. doi: <https://doi.org/10.1016/j.tree.2013.09.004>
- 8 Oliveira SA, et al. 2004. Linkage Disequilibrium and Haplotype Tagging Polymorphisms in the Tau  
9 H1 Haplotype. Neurogenetics 5: 147-155. doi: 10.1007/s10048-004-0180-5
- 10 Pittman AM, et al. 2004. The Structure of the Tau Haplotype in Controls and in Progressive  
11 Supranuclear Palsy. Hum Mol Genet 13: 1267-1274. doi: 10.1093/hmg/ddh138  
12 ddh138
- 13 Plagnol V, Wall JD 2006. Possible Ancestral Structure in Human Populations. PLoS Genet 2: e105.  
14 doi: 10.1371/journal.pgen.0020105
- 15 Povysil G, Hochreiter S 2017. Ibd Sharing between Africans, Neandertals, and Denisovans. Genome  
16 Biol Evol 8: 3406-3416. doi: 10.1093/gbe/evw234
- 17 Prufer K, et al. 2014. The Complete Genome Sequence of a Neanderthal from the Altai Mountains.  
18 Nature 505: 43-49. doi: 10.1038/nature12886
- 19 Racimo F, Marnetto D, Huerta-Sánchez E 2016. Signatures of Archaic Adaptive Introgression in  
20 Present-Day Human Populations. Mol Biol Evol 34: 296-317. doi: 10.1093/molbev/msw216
- 21 Reich D, et al. 2011. Genetic History of an Archaic Hominin Group from Denisova Cave in Siberia.  
22 Nature 468: 1053-1060.
- 23 Sabeti PC, et al. 2002. Detecting Recent Positive Selection in the Human Genome from Haplotype  
24 Structure. Nature 419: 832-837. doi: 10.1038/nature01140  
25 nature01140
- 26 Saitou N, Nei M 1987. The Neighbor-Joining Method: A New Method for Reconstructing  
27 Phylogenetic Trees. Mol Biol Evol 4: 406-425.
- 28 Sankararaman S, et al. 2014. The Genomic Landscape of Neanderthal Ancestry in Present-Day  
29 Humans. Nature 507: 354–357. doi: 10.1038/nature12961
- 30 Sankararaman S, Mallick S, Patterson N, Reich D 2016. The Combined Landscape of Denisovan and  
31 Neanderthal Ancestry in Present-Day Humans. Curr Biol 26: 1241-1247. doi:  
32 10.1016/j.cub.2016.03.037
- 33 Sankararaman S, et al. 2012. The Date of Interbreeding between Neandertals and Modern Humans.  
34 PLoS Genetics 8: e1002947. doi: 10.1371/journal.pgen.1002947
- 35 Setó-Salvia N, et al. 2012. Using the Neanderthal and Denisova Genetic Data to Understand the  
36 Common Mapt 17q21 Inversion in Modern Humans. Hum Biol 84: 633-640. doi:

- 1 10.3378/027.084.0605
- 2 Shimada MK, et al. 2005. Nucleotide Sequence Comparison of a Chromosome Rearrangement on  
3 Human Chromosome 12 and the Corresponding Ape Chromosomes. *Cytogenet Genome Res*  
4 108: 83-90. doi: CGR20051081\_3083
- 5 10.1159/000080805
- 6 Shimada MK, Nishida T 2017. A Modification of the Phylip Program: A Solution for the Redundant  
7 Cluster Problem, and an Implementation of an Automatic Bootstrapping on Trees Inferred from  
8 Original Data. *Mol Phylogenet Evol* 109: 409-414. doi: 10.1016/j.ympev.2017.02.012
- 9 Shimada MK, et al. 2007. Divergent Haplotypes and Human History as Revealed in a Worldwide  
10 Survey of X-Linked DNA Sequence Variation. *Mol Biol Evol* 24: 687-698. doi:  
11 10.1093/molbev/msl196
- 12 Simonti CN, et al. 2016. The Phenotypic Legacy of Admixture between Modern Humans and  
13 Neandertals. *Science* 351: 737-741. doi: 10.1126/science.aad2149
- 14 Stefansson H, et al. 2005. A Common Inversion under Selection in Europeans. *Nat Genet* 37:  
15 129-137.
- 16 Steinberg KM, et al. 2012. Structural Diversity and African Origin of the 17q21.31 Inversion  
17 Polymorphism. *Nat Genet* 44: 872. doi: 10.1038/ng.2335
- 18 Tajima F 1989. Statistical Method for Testing the Neutral Mutation Hypothesis by DNA  
19 Polymorphism. *Genetics* 123: 585-595.
- 20 The 1000 Genomes Project Consortium 2012. An Integrated Map of Genetic Variation from 1,092  
21 Human Genomes. *Nature* 491: 56-65. doi: 10.1038/nature11632
- 22 The 1000 Genomes Project Consortium 2015. A Global Reference for Human Genetic Variation.  
23 *Nature* 526: 68-74.
- 24 Vernot B, Akey JM 2014. Resurrecting Surviving Neandertal Lineages from Modern Human  
25 Genomes. *Science* 317: 1017-1021. doi: 10.1126/science.1245938
- 26 Vernot B, et al. 2016. Excavating Neandertal and Denisovan DNA from the Genomes of Melanesian  
27 Individuals. *Science* 352: 235-239. doi: 10.1126/science.aad9416
- 28 Wall JD, et al. 2013. Higher Levels of Neanderthal Ancestry in East Asians Than in Europeans.  
29 *Genetics* 194: 199-209. doi: 10.1534/genetics.112.148213
- 30 Wang W, et al. 2018. Incomplete Lineage Sorting and Introgression in the Diversification of Chinese  
31 Spot-Billed Ducks and Mallards. *Curr Zool*. doi: 10.1093/cz/zoy074
- 32 Yang MA, Malaspina AS, Durand EY, Slatkin M 2012. Ancient Structure in Africa Unlikely to  
33 Explain Neanderthal and Non-African Genetic Similarity. *Mol Biol Evol* 29: 2987-2995. doi:  
34 10.1093/molbev/mss117
- 35 Yotova V, et al. 2011. An X-Linked Haplotype of Neandertal Origin Is Present among All  
36 Non-African Populations. *Mol Biol Evol* 28: 1957-1962. doi: 10.1093/molbev/msr024

- 1 Yu Y, Dong J, Liu KJ, Nakhleh L 2014. Maximum Likelihood Inference of Reticulate Evolutionary  
2 Histories. *P Natl Acad Sci USA* 111: 16448-16453. doi: 10.1073/pnas.1407950111
- 3 Zhou Y, et al. 2017. Importance of Incomplete Lineage Sorting and Introgression in the Origin of  
4 Shared Genetic Variation between Two Closely Related Pines with Overlapping Distributions.  
5 *Heredity* 118: 211. doi: 10.1038/hdy.2016.72
- 6 Zietkiewicz E, et al. 2003. Haplotypes in the Dystrophin DNA Segment Point to a Mosaic Origin of  
7 Modern Human Diversity. *Am J Hum Genet* 73: 994-1015.
- 8 Zody MC, et al. 2008. Evolutionary Toggling of the Mapt 17q21.31 Inversion Region. *Nat Genet* 40:  
9 1076-1083. doi: 10.1038/ng.193
- 10

Table 1. Loci determined by LD region with focal SNPs.

| #    | Locus    | LD regions (GRCh37, hg19) |             |             |             | Focal SNPs   |                              | Information of alleles |              |                    | Prior knowledge of the haplotype | Names of haplotypes        |                                                    | Obs.             |                  |
|------|----------|---------------------------|-------------|-------------|-------------|--------------|------------------------------|------------------------|--------------|--------------------|----------------------------------|----------------------------|----------------------------------------------------|------------------|------------------|
|      |          | C.                        | Start       | End         | Length (bp) | SNP position | rsID                         | F.                     | MAF. (1000G) | Ancestral/ Derived |                                  | V.                         | In previous study                                  |                  | In present study |
| I    | Xp11hs   | X                         | 50,521,806  | 50,604,915  | 83,110      | 50,577,285   | rs17249510                   | G                      | Major        | Ancestral          | 0                                | Deeply diverged            | <i>hX</i>                                          | all the others   | D., N.           |
|      |          |                           |             |             |             |              |                              | C                      | 0.0156       | Derived            | 1                                |                            |                                                    |                  |                  |
| II   | dys44    | X                         | 32,226,416  | 32,261,577  | 35,162      | 32,237,621   | rs11795471                   | A                      | Major        | Ancestral          | 0                                | Introgressed               | <i>B006</i>                                        | all the others   | D., N.           |
|      |          |                           |             |             |             |              |                              | G                      | 0.0829       | Derived            | 1                                |                            |                                                    |                  |                  |
| III  | RRM2P4   | X                         | 143,370,584 | 143,393,781 | 23,198      | 143,393,428  | rs6649724                    | T                      | Major        | Ancestral          | 0                                | Introgressed               | <i>Clade A</i>                                     | all the others   | D.               |
|      |          |                           |             |             |             |              |                              | G                      | 0.0787       | Derived            | 1                                |                            |                                                    |                  |                  |
| IV   | MCPH1    | 8                         | 6,270,149   | 6,337,231   | 67,083      | 6,302,183    | rs930557                     | G                      | 0.3552       | Ancestral          | 0                                | Introgressed               | <i>D</i>                                           | all the others   | D., N.           |
|      |          |                           |             |             |             |              |                              | C                      | Major        | Derived            | 1                                |                            |                                                    |                  |                  |
| V    | 17q21inv | 17                        | 43,654,468  | 44,205,122  | 550,655     | 43,856,639   | rs62057061<br>(←rs117245596) | G                      | 0.0861       | Ancestral          | 1                                | See discussion             | <i>H2</i>                                          | haplotypes-A~D   | D., N.           |
|      |          |                           |             |             |             |              |                              | C                      | Major        | Derived            | 0                                |                            |                                                    |                  |                  |
| VI   | STAT2    | 12                        | 56,623,347  | 56,753,822  | 130,476     | 56,750,204   | rs2066819                    | C                      | Major        | Ancestral          | 0                                | Introgressed               | <i>N</i>                                           | all the others   | D.               |
|      |          |                           |             |             |             |              |                              | T                      | 0.0313       | Derived            | 1                                |                            |                                                    |                  |                  |
| VII  | OAS      | 12                        | 113,350,796 | 113,381,695 | 30,900      | 113,357,442  | rs2660                       | G                      | 0.2123       | Ancestral          | 0                                | Introgressed <sup>1)</sup> | <i>Deep</i> <sup>2)</sup> , <i>R</i> <sup>3)</sup> | haplotypes-A~E,G | N.               |
|      |          |                           |             |             |             |              |                              | A                      | Major        | Derived            | 1                                |                            |                                                    |                  |                  |
| VIII | HYAL     | 3                         | 50,240,131  | 50,417,061  | 176,931     | 50,328,173   | rs116075629                  | T                      | Major        | Ancestral          | 0                                | Both <sup>5)</sup>         | All <sup>5)</sup>                                  | all the others   | D., N.           |
|      |          |                           |             |             |             |              |                              | C                      | 0.005        | Derived            | 1                                |                            |                                                    |                  |                  |

Abbreviations: C., chromosome; F., allele on forward strand; MAF., minor allele frequency; V, allele in downloaded VCF file; Obs., observed archaic allele in 1000 Genomes; D., Denisovan, N., Neanderthal

References: (I) Shimada et al. (2017); (II) Zietkiewicz et al. (2003), Yotova et al. (2011); (III) Garrigan et al. (2005), Cox et al. (2008); (IV) Evans et al. (2006); (V) Stefansson et

al. (2005), Hardy et al. (2005), Donnelly et al. (2010); (VI) Mendez et al. (2012b); (VII) Mendez et al. (2012a, 2013); (VIII) Ding et al. (2013)

1) Our OAS locus overlapped with two shorter loci that were previously studied: the 5' end (Mendez et al. 2012a) and 3' end (Mendez et al. 2013) of the OAS1 gene. We found frequent recombination between the two loci that caused confusion about relationships among the haplotypes that showed introgression from Denisovans (Mendez et al. 2012a) and Neanderthals (Mendez et al. 2013). See Discussion for the effect of the recombination. 2) Mendez et al. (2012a). 3) Mendez et al. (2013). 4) Haplotype *F* clustered with haplotypes *A–E* but contained the derived “A” allele of the focal SNP; conversely, haplotype *G* contained the ancestral “G” allele despite its closer relationship with haplotypes *H–Q* (Fig. 2). 5) Because we selected different SNPs from a previous study (Ding et al. 2013), both alleles at rs12488302 that represented the “introgressive” and “non-introgressive haplotypes” in the previous study were included in the haplotypes bearing the T allele at our focal SNP, rs116075629.

Table 2. Summary of results

| #    | Locus    | Topology<br>type <sup>(1)</sup> | S* analysis              |            | EHH analysis |                   | Possible scenario                                                                                                                                                                                                                                                                                                                                   |
|------|----------|---------------------------------|--------------------------|------------|--------------|-------------------|-----------------------------------------------------------------------------------------------------------------------------------------------------------------------------------------------------------------------------------------------------------------------------------------------------------------------------------------------------|
|      |          |                                 | Grad<br>e <sup>(2)</sup> | Cl.<br>(3) | CR<br>(4)    | AS <sup>(5)</sup> |                                                                                                                                                                                                                                                                                                                                                     |
| I    | Xp11hs   | Co                              | I                        | -          | +/-          | n/a               | Incomplete lineage sorting (ILS) of highly diverged lineage has existed before OOA (cluster <i>A</i> & <i>B</i> )                                                                                                                                                                                                                                   |
| II   | dys44    | FE - N.<br>Fo - D.              | I & II                   | +          | -            | n/a               | Introggression into ancestor of European occurred, followed by recombination that alter allele at focal SNP of haplotype <i>A</i> (ancestral to derived) and haplotype <i>T</i> (derived to ancestral)                                                                                                                                              |
| III  | RRM2P4   | FE - N.<br>n/a - D.             | I & II                   | +          | -            | n/a               | Ancestral polymorphism that exists before divergence between Denisovan and other humans has been maintained; Altai Neanderthal introgressed to modern human after OOA (Clusters <i>A</i> to <i>B</i> ) followed by recombination among clusters <i>C</i> to <i>F</i>                                                                                |
| IV   | MCPH1    | Af                              | II                       | +          | -            | ++                | Gene flow between ancestors of modern Asian and both of Altai Neanderthal and Denisovan, possibly introgression to archaic from modern Asian (cluster <i>O</i> ); however, suggested strong positive selection at Eurasia on the allele that derived in modern humans, which cause significant difference in LD length and distortion of clustering |
| V    | 17q21inv | Co - w<br>FA - 1                | I & II                   | -          | -            | -                 | Limitation of recombination between different-orientation chromosomes is thought to have maintained the diverged two haplotype families, <i>H1</i> and <i>H2</i> ; not necessarily require the introgression from other ancient population than Altai Neanderthal and Denisovan to explain                                                          |
| VI   | STAT2    | FE/Ea - N.<br>Fo - D.           | I & II                   | -          | -            | n/a               | ILS of lineages have existed before OOA and most were migrated to Eurasia, or introgression from other hominins during OOA.                                                                                                                                                                                                                         |
| VII  | OAS      | FE - N.<br>FA - D.              | I & II                   | +          | +            | -                 | Introggression from Neanderthal occurred at Eurasia after OOA, suggested by clusters <i>A</i> to <i>E</i>                                                                                                                                                                                                                                           |
| VIII | HYAL     | Af                              | II                       | +          | +            | n/a               | A diverged haplotype (Cluster <i>A</i> ) has existed since before OOA of modern human ancestor population; gene flow with Neanderthal into Asian happened (clusters <i>C, D, E, P</i> )                                                                                                                                                             |



- (1) NJ trees were classified according to Fig. 3. n/a: Low BS around nodes of archaic hominins, Neanderthals (N.), and Denisovans (D.); two kinds of classifications were made for the 17q21inv locus: one classified based on relationship among clusters *G* to *R*, which represents non-recombinant H1 lineages (l) and the second based on relationships among all clusters within the whole tree (w).
- (2) Introgression grade observed in multiple haplotypes within a cluster; I for high  $S^*$  score and II for middle  $S^*$  score indicate high and moderate possibilities of introgression, respectively. See Materials and Methods for details.
- (3) Colocalization of Eurasian haplotypes with  $S^*$  and archaic haplotypes in the same cluster.
- (4) A constrained region was defined by distribution skewness of SNPs that produce bifurcation in EHH analysis; shown as observed (+), neutral (+/-), or not observed (-).
- (5) Allelic selection was defined by EHH range differences between two alleles of focal SNPs at  $EHH = 0.5$  in the EHH plot, and was classified by the proportion of short to long ranges, in which  $(-\infty, 0.1)$ ,  $[0.1, 0.2)$ ,  $[0.2, 0.4)$ ,  $[0.4, 1]$  are represented by '++', '+', and '+/-', '-', respectively. Not applicable (n/a) is indicated if the MAF was not more than 0.1.

Table 3. S\* analysis results

| #    | Locus    | Tree topological relationship of modern human |                                             | Clustering pattern of haplotypes with S*                                                                                                               | Miscellaneous note                                                                                                                                      |
|------|----------|-----------------------------------------------|---------------------------------------------|--------------------------------------------------------------------------------------------------------------------------------------------------------|---------------------------------------------------------------------------------------------------------------------------------------------------------|
|      |          | to Neanderthal                                | to Denisovan                                |                                                                                                                                                        |                                                                                                                                                         |
| I    | Xp11hs   | Closely related with an African cluster       | Closely related with an African cluster     | Except five African haplotypes used as reference, all haplotypes in the outmost cosmopolitan cluster marked high-grade S*                              | No S* was observed other than the outmost cluster ( <i>A</i> and <i>B</i> )                                                                             |
| II   | dys44    | Clustered with European                       | External and Independent                    | Cosmopolitan outer cluster includes high-grade S* and Neanderthal                                                                                      | High S* independently marked on haplotype <i>T</i> that focal SNP allele suggest to be a recombinant                                                    |
| III  | RRM2P4   | Clustered with Eurasian                       | Independent                                 | Cosmopolitan outer cluster includes high-grade S* and Neanderthal                                                                                      | Clusters <i>C</i> to <i>F</i> suggests another but related event with introgression from Altai Neanderthal                                              |
| IV   | MCPH1    | Clustered with S* Asian                       | Clustered within Asian with S*              | Inner cluster includes multiple Asian with medium-grade S*, Neanderthal, and Denisovan                                                                 | Strongly suggested gene flow between Asian and archaic humans                                                                                           |
| V    | 17q21inv | Clustered with African                        | Clustered with African                      | Outmost cluster includes <i>H2</i> haplotypes with high or medium-grade S*                                                                             | Reference population may not contain enough number of Africans with inverted haplotype <i>H2</i> , which resulted in high S* scores in <i>H2</i> family |
| VI   | STAT2    | Independent                                   | Independent                                 | Outer cluster includes multiple Eurasian with S* and located closer to Neanderthal and Denisovan than other modern human clusters                      | S* suggests introgression from unknown but related with Neanderthal or Denisovan                                                                        |
| VII  | OAS      | Clustered with S* Eurasian                    | Closely related with inner African clusters | Cosmopolitan outer cluster including high-grade S* and Neanderthal                                                                                     | S* on haplotype on an American clustering with African may suggest novel combination of rare alleles by recent recombination (haplotype <i>N</i> )      |
| VIII | HYAL     | Clustered with Eurasian                       | Independent                                 | Eurasian cluster <i>C</i> includes Neanderthal and multiple medium-grade S*; outmost African cluster <i>A</i> includes one American with high-grade S* | S* at cluster <i>O</i> can be recombination according to network topology                                                                               |

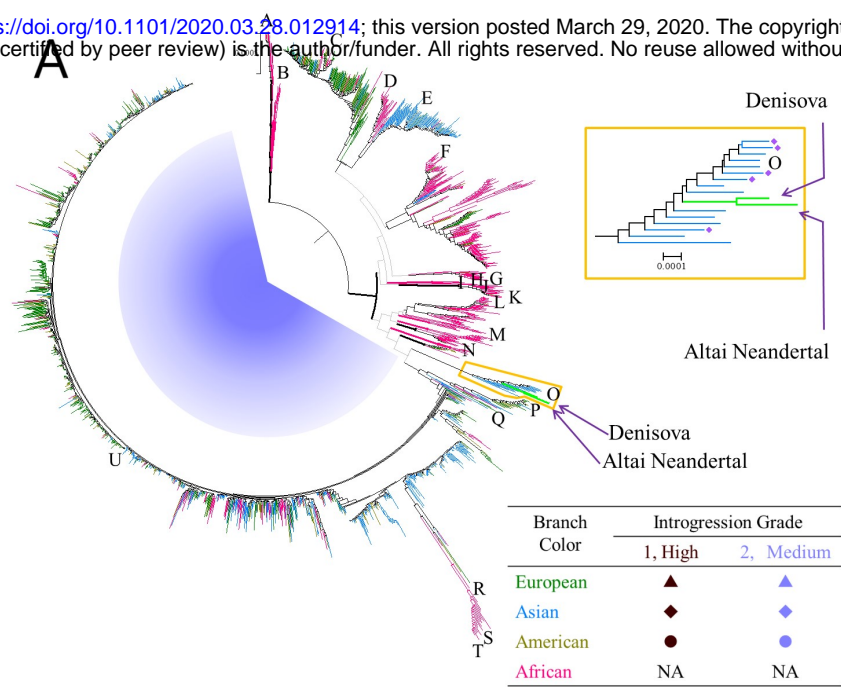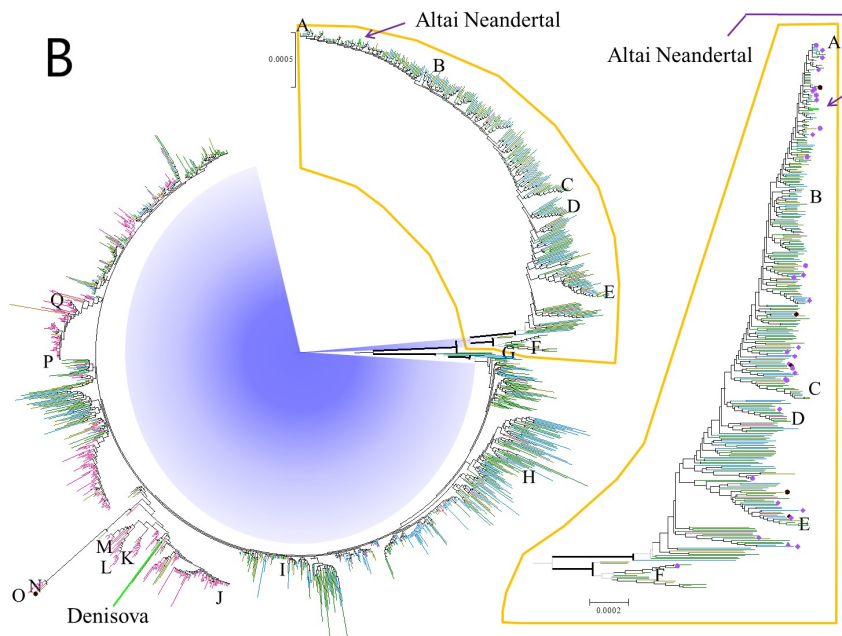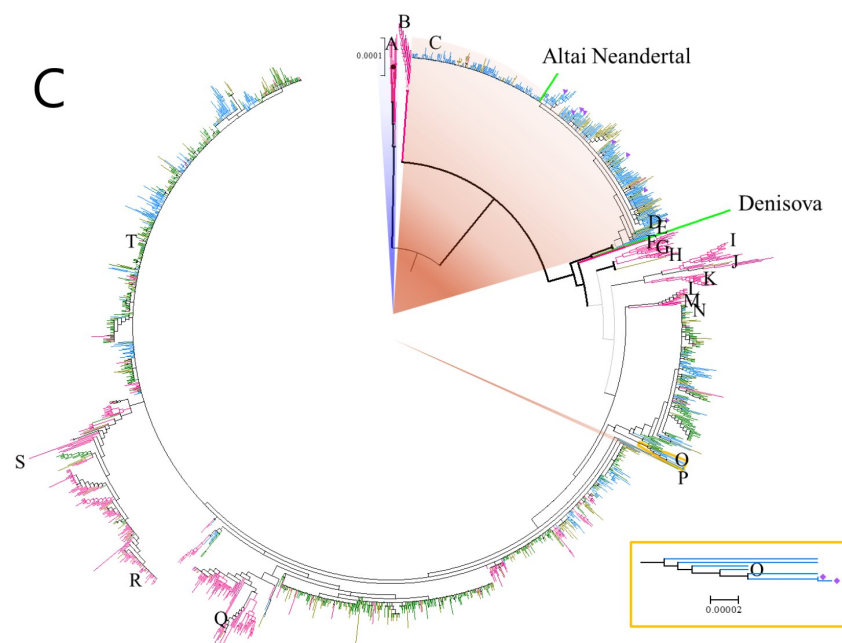

Figure 1

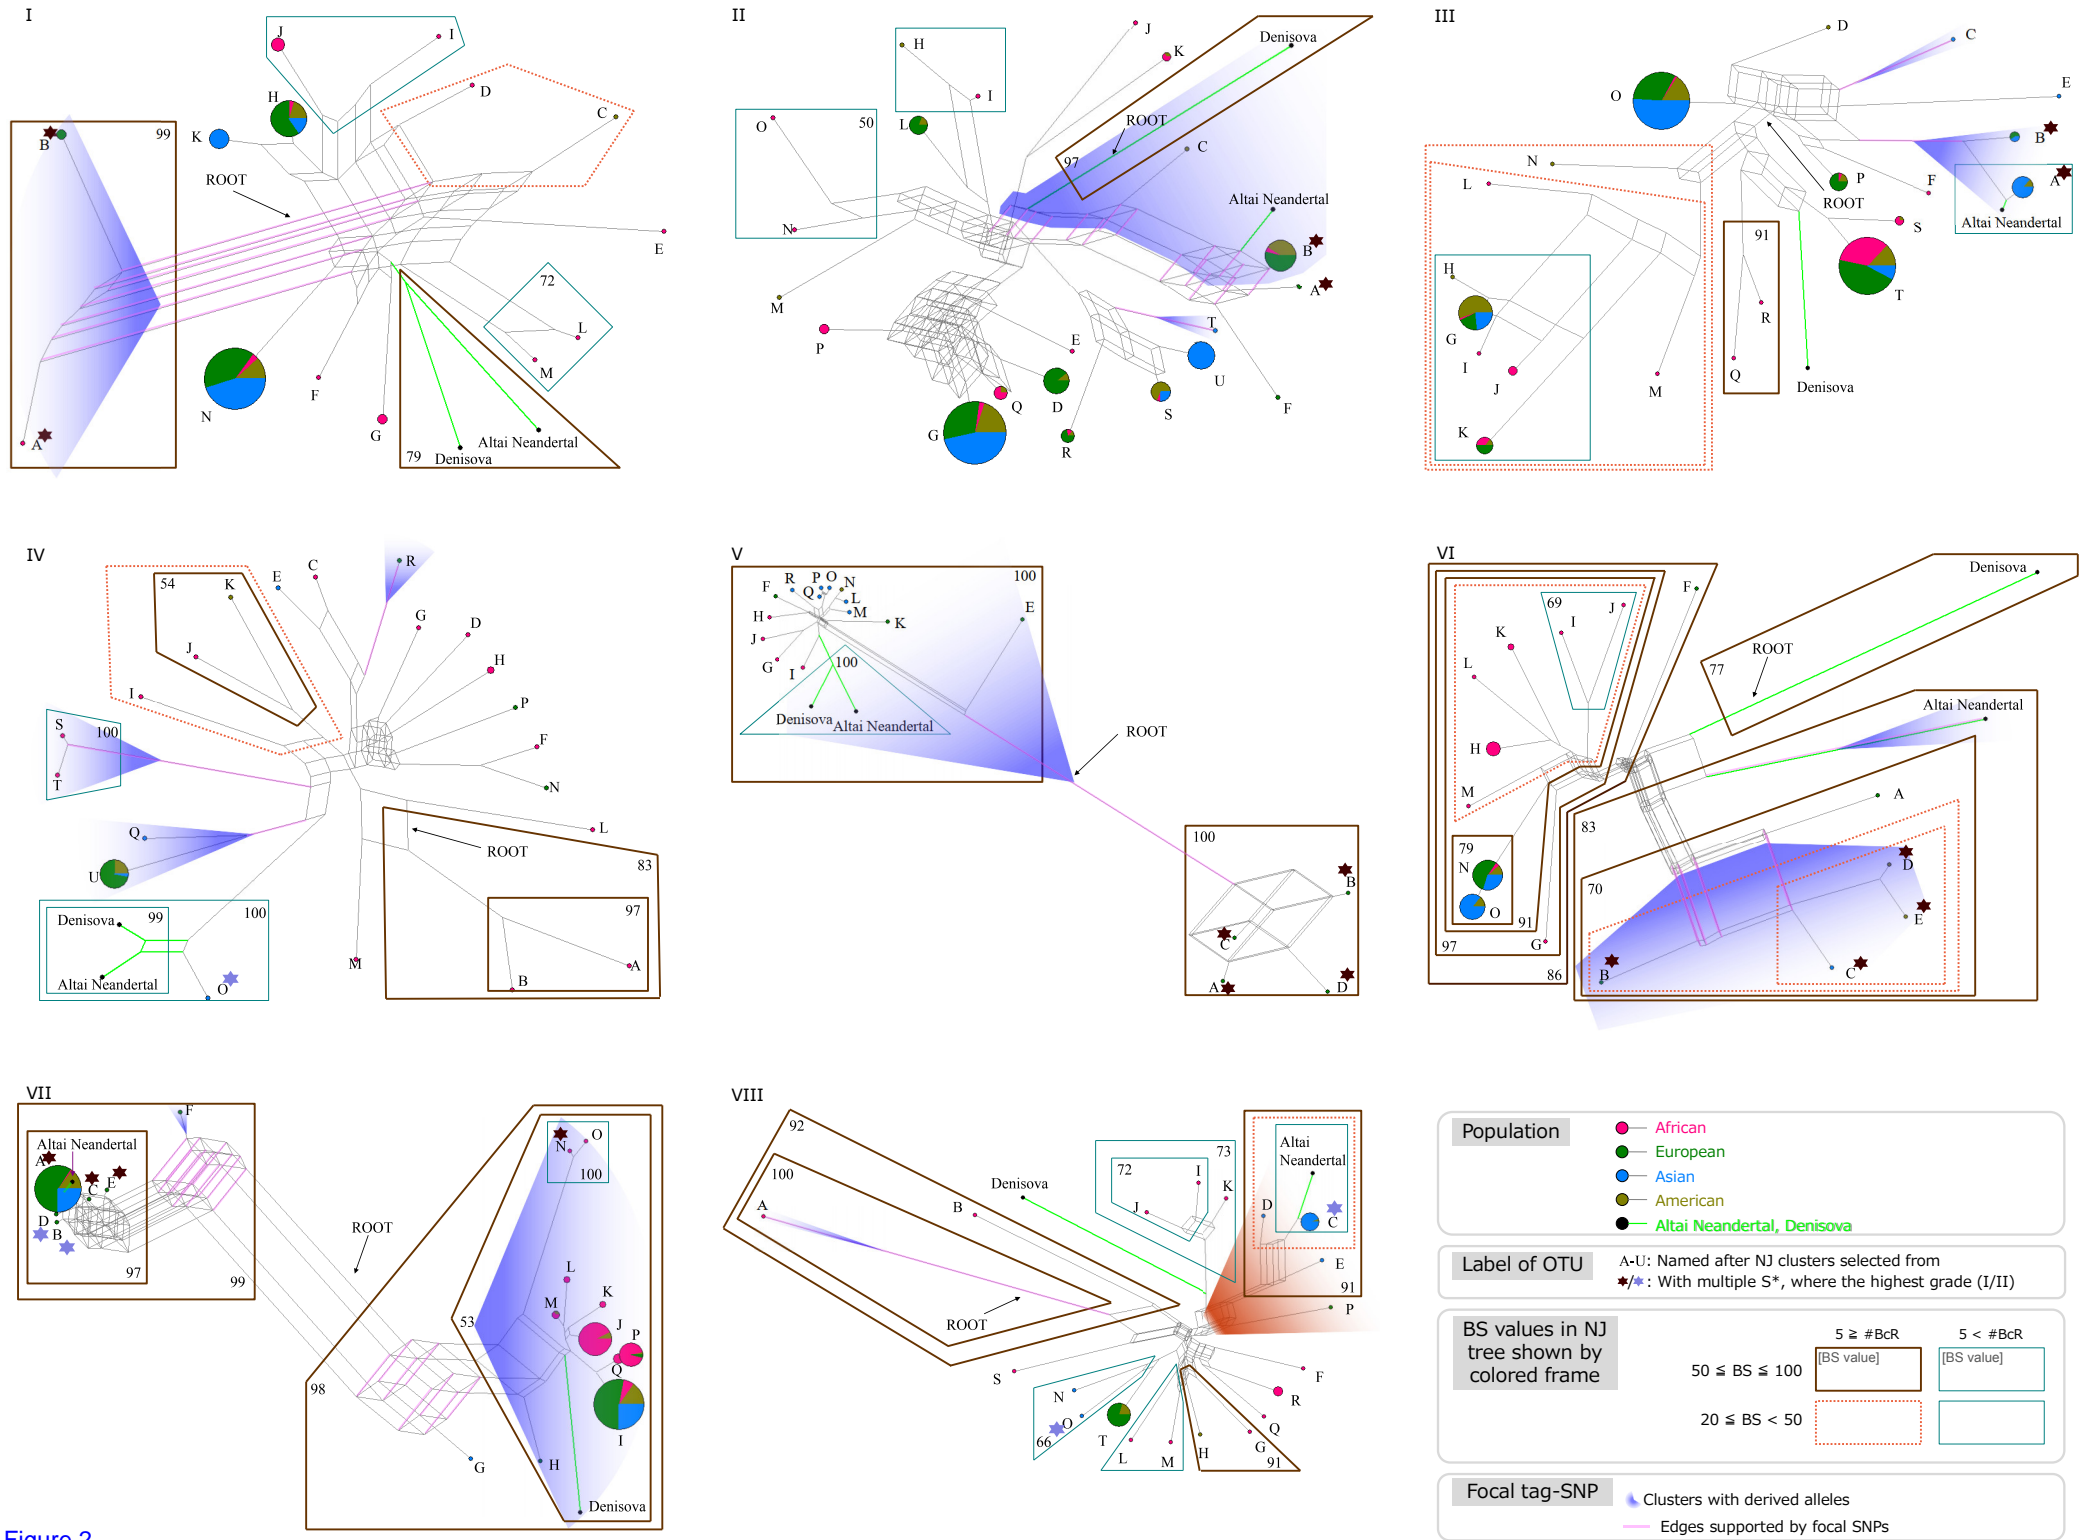

Figure 2

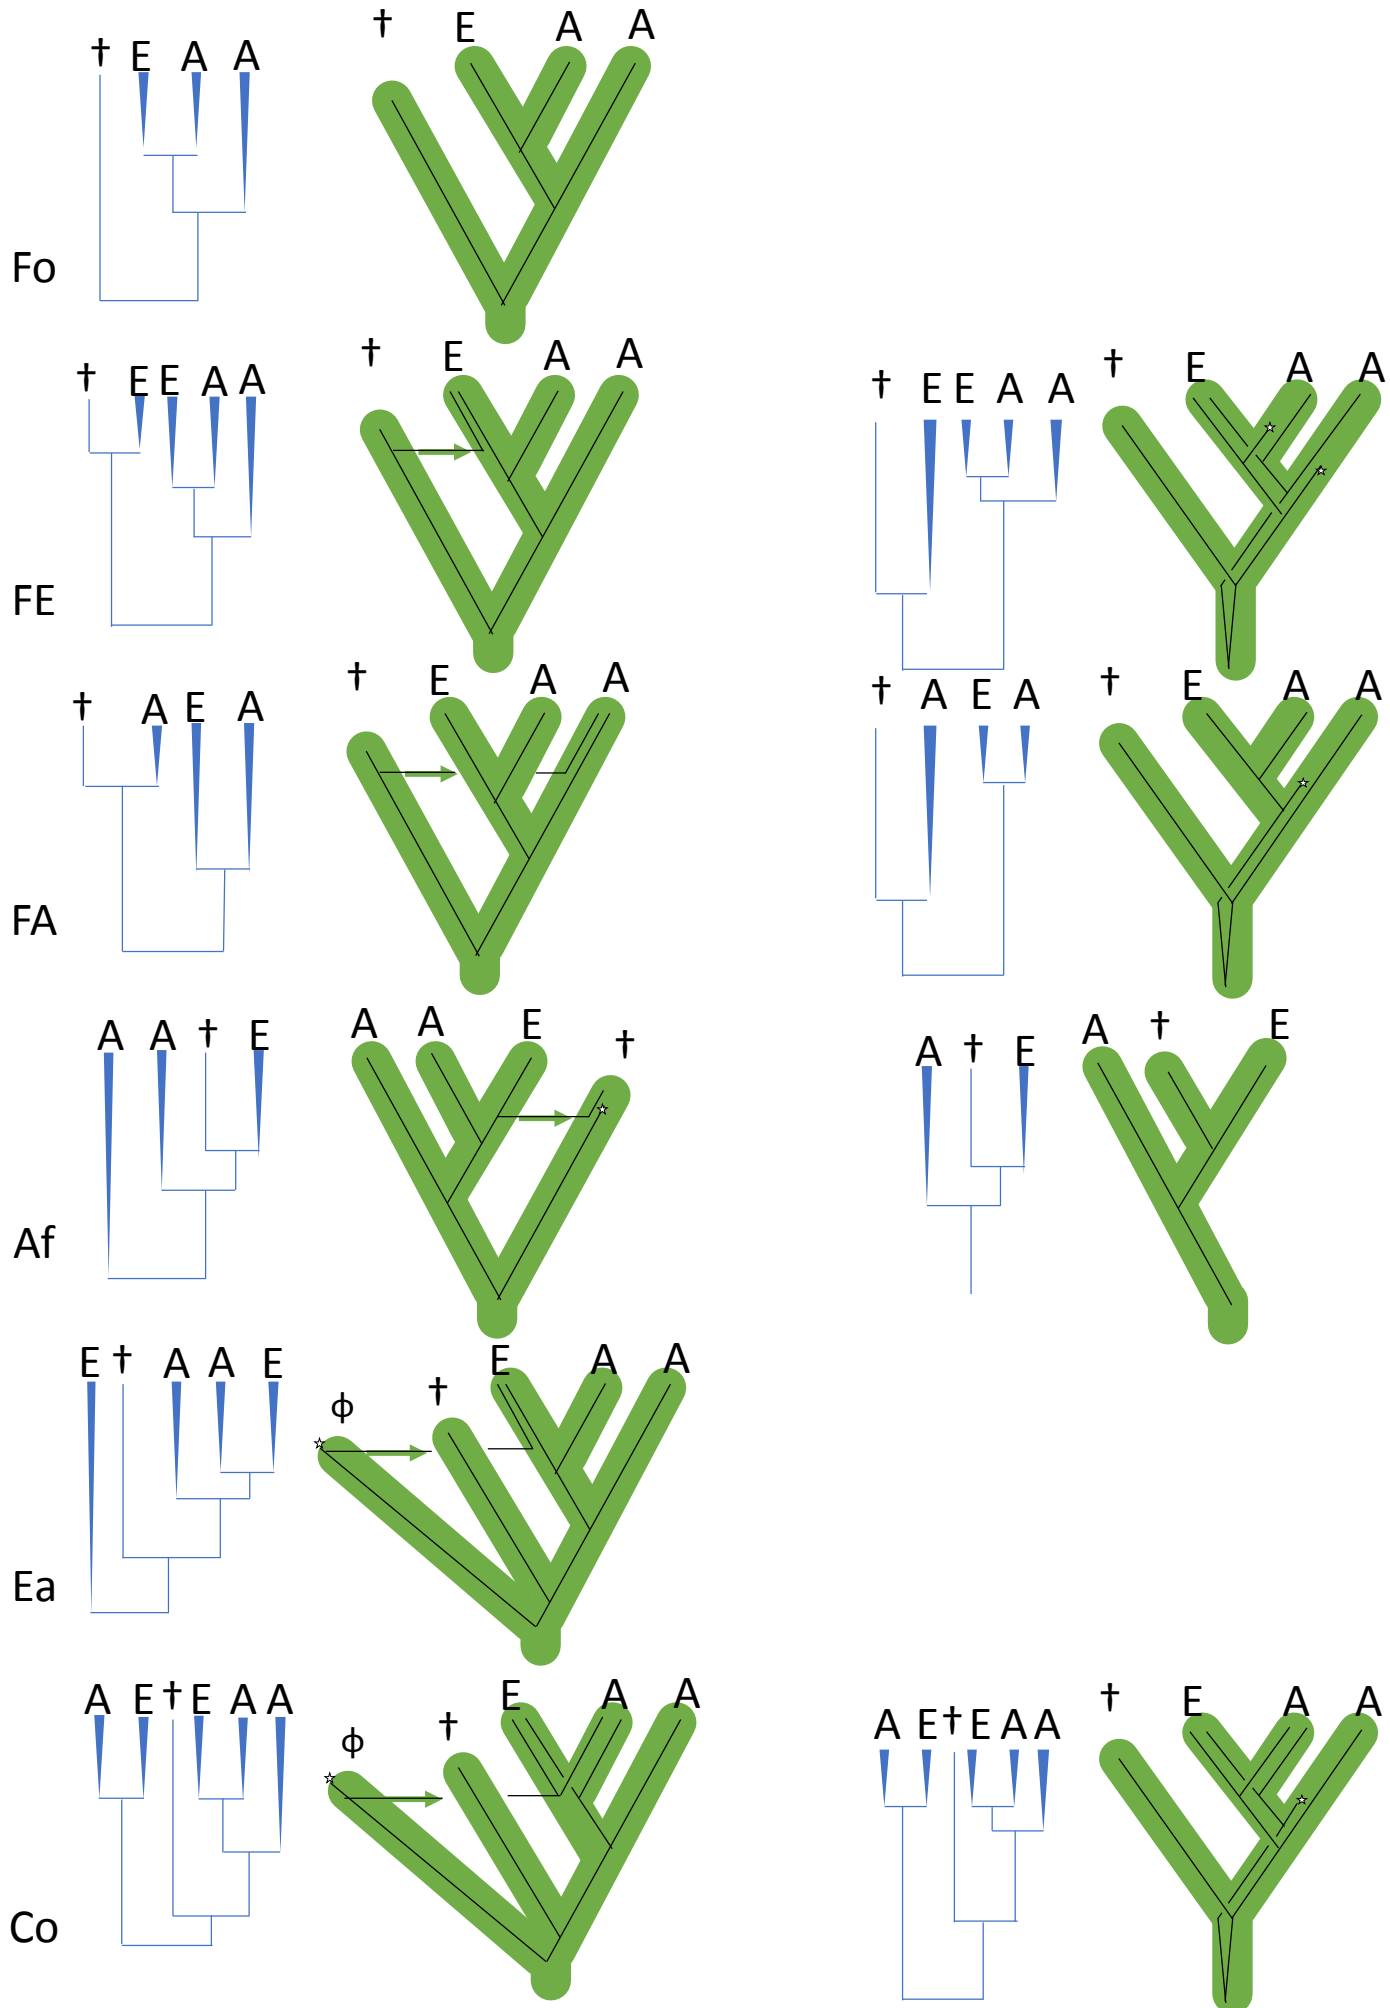

Figure 3

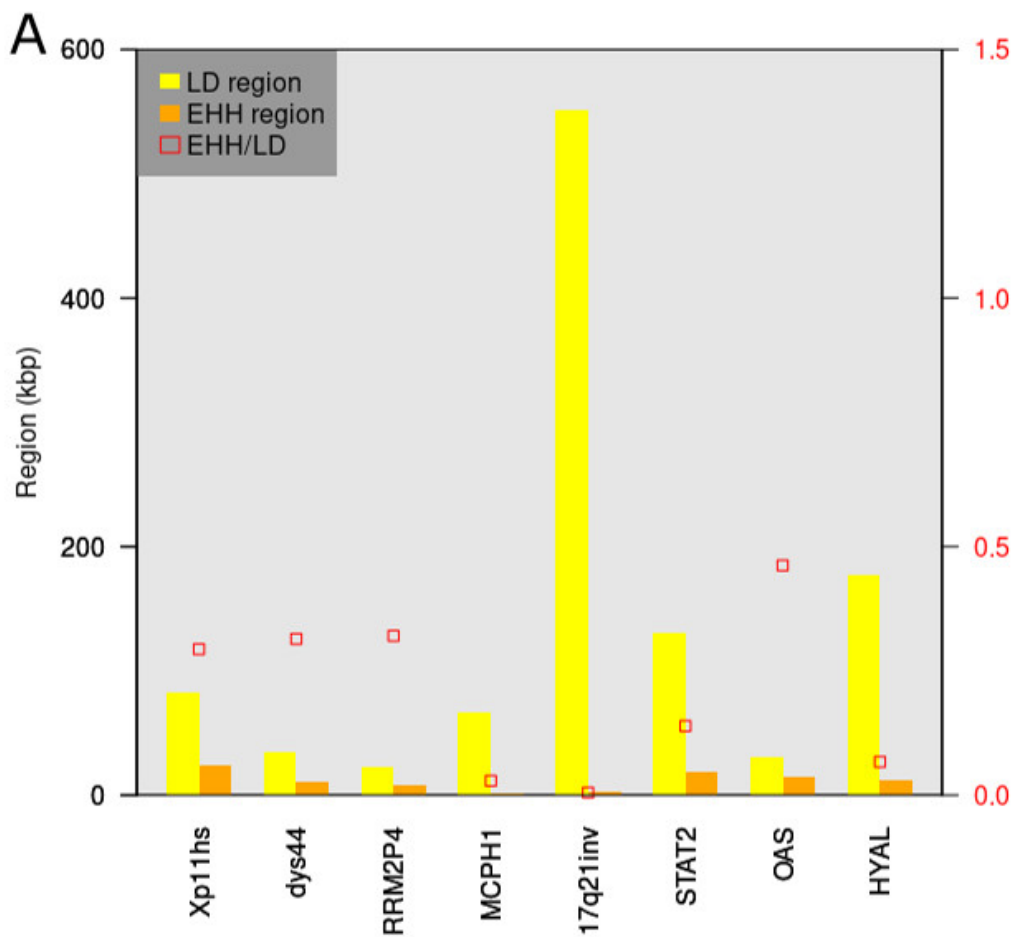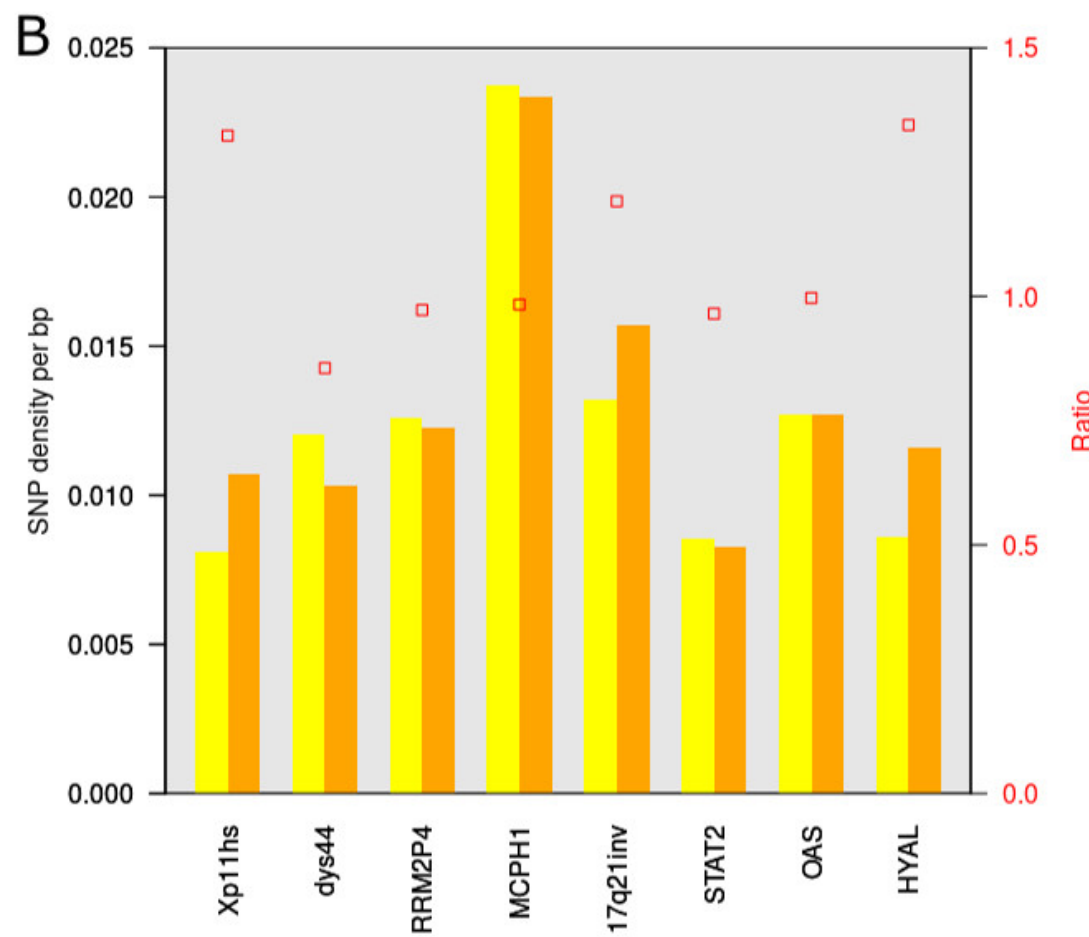

Figure 4

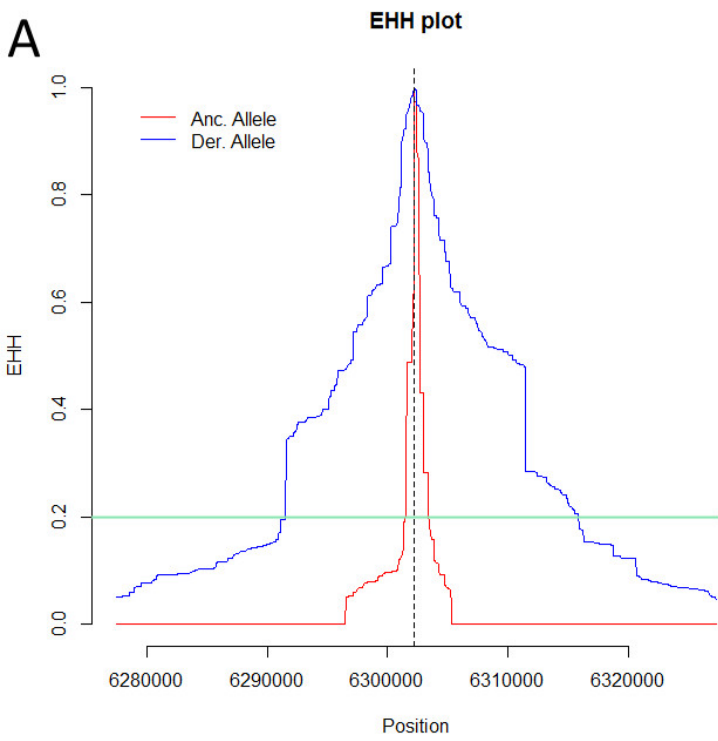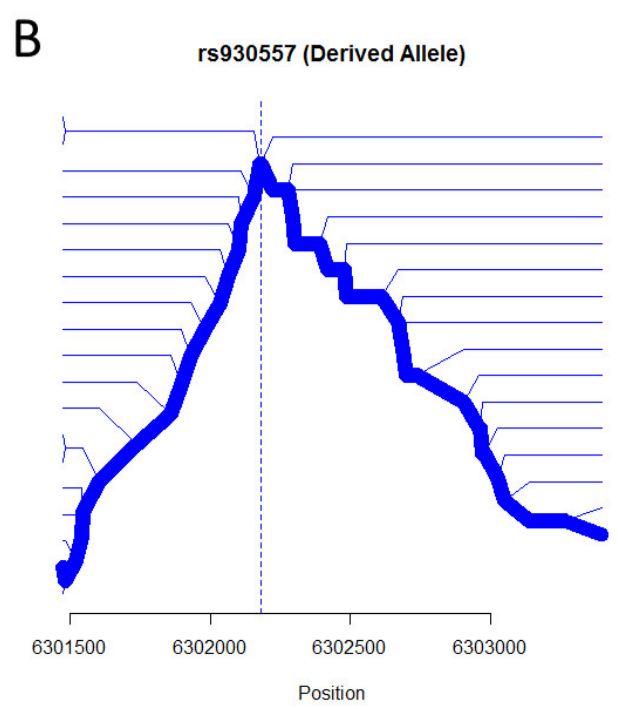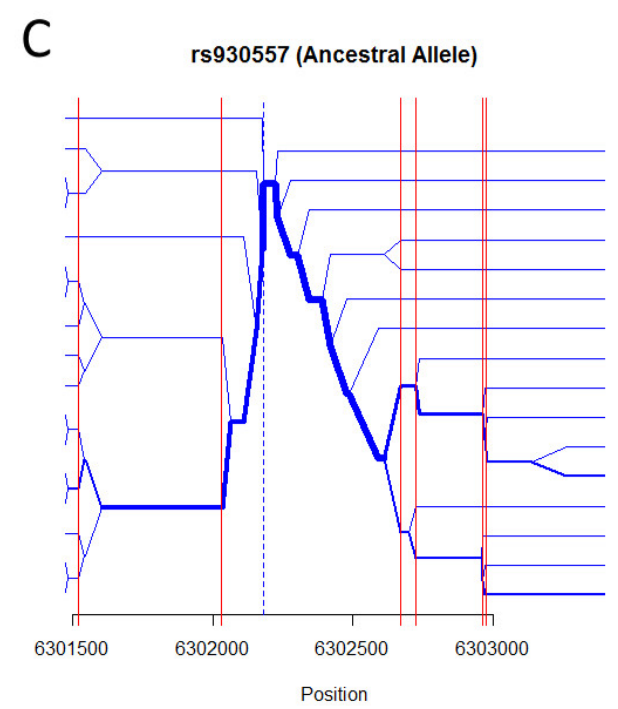

Figure 5
